# Supplementary material
Source: PubMed Central journal article supplement (PMC4854298)
Supplement: NIHMS780706-supplement-Appendices.pdf [file NIHMS780706-supplement-Appendices.pdf]

1 **Supplementary Material accompanying the manuscript titled, “Prevention of Hepatitis C By**  
2 **Screening and Treatment in United States Prisons” by Tianhua He, Kan Li, Mark S. Roberts,**  
3 **Anne C. Spaulding, Turgay Ayer, John J. Grefenstette, Jagpreet Chhatwal.**

4  
5 **Supplementary Appendix 1: Model Structure and Inputs**

6 S1.1 Overall Model Features  
7 S1.2 Baseline Population  
8 S1.3 HCV Transmission  
9 S1.4 HCV Disease Progression  
10 S1.5 HCV Diagnosis and Treatment  
11 S1.6 Arrest and Release Prisoners  
12 S1.7 Injection Drug Use  
13 S1.8 Cost Inputs and Quality-of-Life Weights

14  
15 eTable 1. Baseline Demographics in the Model  
16 eTable 2. Baseline Age Distribution  
17 eTable 3. Baseline Hepatitis C Prevalence  
18 eTable 4. Baseline Hepatitis C Disease Distributions  
19 eTable 5. Transmission-Related Parameters  
20 eTable 6. Natural History Transition Probabilities  
21 eTable 7. Probability of Getting Diagnosed for Inmates and General Population  
22 eTable 8. Treatment Duration and Sustained Viral Response (SVR) Rates of oral DAAs by Virus  
23 Genotype, Disease States, and Treatment History  
24 eTable 9. Probability of Incarceration  
25 eTable 10. Length of Sentences  
26 eTable 11. Cost Parameters (in 2014 US dollars)  
27 eTable 12. Health-Related and Age-related Quality-of-Life Inputs

28  
29 **Supplementary Appendix 2: Model Validation**

30 S2.1 Natural History of HCV  
31 S2.2 Arrest and Release of Prisoners  
32  
33 eTable 13. Validation of the Natural History of HCV  
34 eTable 14. Validation of Admission and Release of Prisoners

35  
36 **Supplementary Appendix 3: Additional Results**

37 S3.1 Additional Base-case Results  
38 eFigure 1. HCV Infections Averted over Time  
39 eFigure 2. Reduction in HCV Infected People in Prison over Time  
40 eFigure 3. Total Cost of HCV Screening and Treatment in Prisons from 2015 to 2029

41

|    |                                                                                              |
|----|----------------------------------------------------------------------------------------------|
| 42 | S3.2 Sensitivity Analyses                                                                    |
| 43 | eTable 15. Results of 1-Way Sensitivity Analysis Showing New Infections Averted              |
| 44 | eTable 16. Results of 1-Way Sensitivity Analysis Showing Liver-Related Deaths Averted        |
| 45 | eTable 17. Results of 1-Way Sensitivity Analysis Showing the Cost-effectiveness of Screening |
| 46 | Strategies                                                                                   |
| 47 | eTable 18. Results of 1-Way Sensitivity Analysis Showing 1-year Prison Budget                |
| 48 | eTable 19. Results of 1-Way Sensitivity Analysis Showing 15-year Prison Budget               |
| 49 |                                                                                              |
| 50 | S3.3 Scenario Analyses                                                                       |
| 51 | eTable 20. 30-year cumulative incidences of infection, advanced diseases, and results of     |
| 52 | cost-effectiveness analysis of scenario when all F0-F4 patients were eligible for treatment. |
| 53 | eTable 21. 30-year cumulative incidences of infection, advanced diseases, and results of     |
| 54 | cost-effectiveness analysis of scenario when F3-F4 patients were treated immediately after   |
| 55 | diagnosed.                                                                                   |
| 56 |                                                                                              |

## 57 **Supplementary Appendix 1: Model Structure and Inputs**

### 58 **S1.1 Overall Model Features**

59 We developed *TapHCV* (treatment as prevention of hepatitis C virus) model, an agent-based  
60 model (ABM) to simulate the population dynamics of both prisoners and general population in the  
61 community in order to gain insight into the relationship between prison-related interventions and  
62 hepatitis C virus (HCV) disease burden in society. Agents in our model were prisoners or  
63 community members with or without HCV. The model was developed in Java, a general-purpose  
64 computer programming language (1), and consisted of the following major components: HCV  
65 disease transmission and progression, HCV screening and treatment, and simulation of prison and  
66 general population dynamics. The baseline population in the model represented the United States  
67 population in 2015.  
68  
69

70  
71 We used 2 million agents to define our population and adjusted all results by a factor of 152.6 to  
72 project national data. We stratified our model's population, based on data in year 2009, with age,  
73 gender, health states, prevalence of HCV, range of HCV genotype, treatment acceptability,  
74 treatment experiences, injection drug use, and incarceration history (Appendix S1.2). All agents  
75 followed the same rule of behaviors, which include aging and dying, incarceration and release  
76 from prisons, initiating and quitting drug use, infecting others, disease progression, etc. These  
77 actions are dependent on patient demographics as well as the location of agents. We assumed  
78 that the agents' behavior rules were not changed in the next 30-years due lack of data on future  
79 trends.  
80

81 We simulated the long-term benefits and costs of 5 HCV screening scenarios in prison, from mild  
82 to intense, starting from year 2015: 1) no screening, 2) 1-time risk-based screening of currently  
83 incarcerated and entrants who were active or former IDUs for 1 year (1Yr-Risk), 3) 1-time opt-out  
84 universal HCV screening of currently incarcerated inmates followed by opt-out screening of all  
85 incoming inmates for up to 1 year (1Yr-All), 4) 5 years (5Yr-All), and 5) 10 years (10Yr-All)..  
86 Diagnosed patients were eligible for treatment, based on their fibrosis score, with recently  
87 approved direct-acting antivirals (DAAs). We projected 30-year cumulative costs and  
88 quality-adjusted life years (QALYs) for each scenario. In addition, we projected reduction in costs  
89 and disease burden by reduction in the number of new HCV infections, decompensated cirrhosis,  
90 hepatocellular carcinoma, liver transplants and liver-related deaths.  
91

92 We performed all model runs on MD Anderson RISTS HPC Cluster with 2.2 GHz AMD Opteron  
93 6174 processor. We ran our model in parallel, 40 times using different random number seeds. The  
94 average execution time of each run was 15.32 hours.  
95

## S1.2 Baseline Population

The initial condition was modeled to simulate socio-demographic feature of US population in year 2009 due to lack of HCV-related data in 2015. We generated 2 million heterogeneous agents to define our population and adjusted all results by a factor of 152.6 to project national data. Among those, 0.5% were inside state or federal prisons at any given time (eTable 1)(2). Our model didn't include population in jails, which are short-stay facilities while prisons are long-term facilities.

We probabilistically assigned population characteristics to the model, including age, gender, and drug use behavior (active or former injection drug users [IDUs] and non-IDU). We used the statistical reports of US Census Bureau and Bureau of Justice Statistics (BJS) to define age distribution of general and incarcerated population, respectively (eTable 2) (2-5). Then we assigned a proportion of individuals between age 15 and 50 to be either active or former injection IDU based on published surveys (6, 7). We adjusted HCV prevalence using two hazard ratios—one for active and former IDUs, and the other for inmates (eTable 3). Then we assigned HCV infection status based on individuals' characteristics and further define their health states, genotype of HCV virus, treatment acceptability, and treatment history.

We also considered population growth. Newborns were added each year based on the annual birth rates in the US (8). We used 2011 census life-tables for the annual mortality rates from non-hepatic causes (9). For injection drug users and inmates, we adjusted the baseline mortality rates by standardized mortality ratio (SMR) (eTable 1) (10, 11).

The prevalence of HCV for IDUs and non-IDUs by age were derived from NHANES data (eTable 3) (12). To assign HCV prevalence in IDUs and prisoners in the model we used hazard ratios for IDUs and prisoners, which were back-calculated such that the HCV prevalence among prisoners was 17.6% and that among active IDUs was 35%(12, 13). We found that the hazard ratios of 18 and 12 for IDUs and prisoners, respectively, provided the HCV prevalence within +/- 5% of the reference values. We defined the baseline distribution of the four most common HCV genotypes (G1, 2, 3 and 4), and chronic HCV stages using METAVIR fibrosis scores (no fibrosis [F0], portal fibrosis without septa [F1], portal fibrosis with few septa [F2], numerous septa without fibrosis [F3], or compensated cirrhosis [F4]), advanced HCV states (decompensated cirrhosis, hepatocellular carcinoma, liver transplant, and liver-related death) and treatment history (previously treated or treatment-naïve) using published studies (eTable 4) (14-17).

**eTable 1. Baseline Demographics in the Model**

| Model Parameters          | Value     |
|---------------------------|-----------|
| Population                |           |
| General population        | 2 000 000 |
| Prisoners                 | 10 000    |
| Proportion of inmates (2) | 0.5%      |

|                                                 |                    |                    |
|-------------------------------------------------|--------------------|--------------------|
| <b>Gender (Male%)</b>                           |                    |                    |
| Prisoners (2)                                   |                    | 91%                |
| General population (4)                          |                    | 52%                |
| <b>Prevalence of IDUs (6, 7)</b>                |                    |                    |
|                                                 | <b>Active IDUs</b> | <b>Former IDUs</b> |
| In prisons                                      | 26%                | 20.5%              |
| Outside of prisons                              | 1.2%               | 1.3%               |
| <b>Birth-rate (18)</b>                          |                    |                    |
| Number of newborns per 1000 population per year |                    | 14.3               |
| <b>Standardized mortality ratio (SMR)</b>       |                    |                    |
| IDUs (10)                                       |                    | 2.54               |
| Inmates (11)                                    |                    | 0.85               |

Abbreviations: IDU, injection drug user.

132

133

134

**eTable 2. Baseline Age Distribution**

| <b>Age Category</b> | <b>In General Population (4)</b> |               | <b>In Prisons (2, 5)</b> |               |
|---------------------|----------------------------------|---------------|--------------------------|---------------|
|                     | <b>Female %</b>                  | <b>Male %</b> | <b>Female %</b>          | <b>Male %</b> |
| 0-5                 | 6.7                              | 7.2           | ---                      | ---           |
| 5-9                 | 6.6                              | 7.1           | ---                      | ---           |
| 10-14               | 6.3                              | 6.8           | ---                      | ---           |
| 15-19               | 6.6                              | 7.1           | ---                      | ---           |
| 18-19               | ---                              | ---           | 0.9                      | 1.5           |
| 20-24               | 6.8                              | 7.3           | 11.2                     | 12.4          |
| 25-29               | 6.7                              | 7.2           | 17.4                     | 16.4          |
| 30-34               | 6.5                              | 6.7           | 17.5                     | 16.6          |
| 35-39               | 6.2                              | 6.3           | 14.8                     | 13.8          |
| 40-44               | 6.7                              | 6.8           | 14.1                     | 12.6          |
| 45-49               | 7.2                              | 7.2           | 11.8                     | 11.1          |
| 50-54               | 7.2                              | 7.1           | 7                        | 7.7           |
| 55-59               | 6.5                              | 6.3           | 3.2                      | 4.1           |
| 60-64               | 5.8                              | 5.6           | 1.4                      | 2.1           |
| 65-69               | 4.2                              | 3.7           | 0.9                      | 1.7           |
| 70-74               | 3.2                              | 2.8           | ---                      | ---           |
| 75-79               | 2.6                              | 2.0           | ---                      | ---           |
| 80-84               | 2.2                              | 1.6           | ---                      | ---           |
| >85                 | 2.0                              | 1.2           | ---                      | ---           |

135

136

**eTable 3. Baseline Hepatitis C Prevalence**

| <b>Model Parameters</b>                      | <b>Value</b> |               |
|----------------------------------------------|--------------|---------------|
| <b>HCV Prevalence by Age and Gender (12)</b> | <b>Male</b>  | <b>Female</b> |
| 0-6                                          | 0.0093%      | 0.0093%       |
| 6-20                                         | 0.0498%      | 0.0498%       |

|                                                              |         |         |
|--------------------------------------------------------------|---------|---------|
| 20-29                                                        | 0.1231% | 0.0704% |
| 30-39                                                        | 1.0523% | 0.6023% |
| 40-49                                                        | 3.9494% | 2.2604% |
| 50-59                                                        | 4.3334% | 2.4801% |
| > 60                                                         | 0.8069% | 0.4618% |
| Overall                                                      | 1.9798% | 1.1331% |
| HCV prevalence among newborns (19)                           |         | 0.0093% |
| Hazard ratio of HCV prevalence in IDUs (back-calculation)    |         | 18      |
| Hazard ratio of HCV prevalence in inmates (back-calculation) |         | 12      |

137 Abbreviations: HCV, hepatitis C virus; IDU, injection drug user.

138

139

**eTable 4. Baseline Hepatitis C Disease Distributions**

| Model Parameters                                                   | Value |
|--------------------------------------------------------------------|-------|
| <b>HCV Genotype (14)</b>                                           |       |
| G1                                                                 | 79.6% |
| G2                                                                 | 13.0% |
| G3                                                                 | 6.3%  |
| G4                                                                 | 1.1%  |
| <b>Chronic Hepatitis C Disease Stage (15)</b>                      |       |
| METAVIR score F0                                                   | 13.7% |
| METAVIR score F1                                                   | 24.6% |
| METAVIR score F2                                                   | 18.7% |
| METAVIR score F3                                                   | 16.7% |
| METAVIR score F4                                                   | 22.9% |
| Decompensated cirrhosis                                            | 3.1%  |
| Hepatocellular carcinoma                                           | 0.3%  |
| <b>Proportion of Patients Aware of HCV Infection</b>               |       |
| General population (20)                                            | 50.0% |
| Prisoners (21)                                                     | 25.0% |
| <b>Proportion of Treatment-Experienced Patients (22)</b>           |       |
| Among all diagnosed patients                                       | 39.0% |
| <b>Previous Treatment Response in Genotype 1 Patients (17)</b>     |       |
| Prior relapse                                                      | 53.0% |
| Prior partial response                                             | 19.0% |
| Prior null response                                                | 28.0% |
| <b>Previous Treatment Response in Genotype 2/3/4 Patients (16)</b> |       |
| Prior relapse                                                      | 47.0% |
| Prior partial response                                             | 16.0% |
| Prior null response                                                | 37.0% |

140 Abbreviations: G1–4, genotype 1–4; METAVIR, Meta-analysis of histologic data in viral hepatitis; IDU, injection drug user.  
141

### 142 S1.3 HCV Transmission

143  
144 We modeled two kinds of HCV transmission, 1) IDU-related, and 2) everything else, separately in  
145 prisons and in the general population. We explicitly modeled IDU-related transmission in the  
146 model, which contributes to 60% of all HCV transmissions (23, 24). Because data on non-IDU  
147 transmission is limited, we did not simulate specific modes of transmission, and instead grouped  
148 them together.

149  
150 At each month, we constructed links between agents to simulate HCV transmission among them  
151 and updated these links in every cycle. For that purpose, we probabilistically formed pairs between  
152 individuals. HCV-infected individual inside prisons could only pair with those inside prisons, and  
153 vice versa. IDUs had a higher probability of pairing with other IDUs, and vice versa. Note that we  
154 did not explicitly model sexual transmission in our model due to lack of data on the sexual  
155 behaviors and transmission rates.

156  
157 Once a possible transmission pair was formed, an infected individual could transmit HCV to a  
158 susceptible individual with a probability,  $P_{trans}$ . This transmission probability was dependent on:  
159 awareness of infector's HCV status, prior HCV treatment, and injection drug use status of both  
160 infector and infectee.

161  
162 We calculated  $P_{trans}$  as follows:

$$163 P_{trans} = P_D \times (1 - A_I) \times (1 - T_I)$$

164 where  $P_D$  was:

$$165 P_D = 1 - (1 - P_0)^{D_I \times D_E}$$

166  $A_I$  was a reduction factor for infectors' HCV awareness status,  $T_I$  was a reduction factor for prior  
167 HCV treatment,  $D_I$  was the hazard ratio for injection drug use of an infector, and  $D_E$  was the hazard  
168 ratio for injection drug use of an infectee (eTable 5). Thus we differentiated agents by their prior  
169 treatment and HCV awareness in terms of their likelihood to be infected.

170  
171 Because some transmission-related parameters are not known, we estimated their values using a  
172 calibration process (25). Particularly, we ran our simulation model with several possible  
173 combinations of three unknown variables: baseline transmission probability, IDU-IDU interaction  
174 probability, and hazard ratio of infection due to needle sharing (eTable 5) and selected the  
175 combination that matched the computer generated output with the known HCV incidence reported  
176 by the Center for Disease Control and Prevention (CDC) reports (26). This process is referred to  
177 as *calibration*, and has been applied to several disease models (27). We used the standard  
178 Calibration Reporting Checklist to define our calibration approach (27). These were defined as: 1)  
179 Target data and corresponding model output: 10-year cumulative incidence of HCV in IDUs; 2)  
180 Search algorithm: trial and error; 3) goodness of fit metric: relative distance of within 5%; 4)  
181 Acceptance criteria: within 5% of target value; 5) Stopping rule: manual; and 6) Validation: none.  
182 Our model projected the 10-year cumulative incidence of HCV in IDUs to be 179 700, which was



183 5% over that reported by the CDC. We assumed that the awareness of one's HCV status and a  
 184 successful prior HCV treatment would reduce the contact probability by 50% and 70%,  
 185 respectively. Our results were not sensitive to any of above parameters (see supplementary  
 186 appendix 3 for details).

187

188 **eTable 5. Transmission-Related Parameters**

| <b>Transmission Probability per Contact (Assumed and Calibrated)</b>                               |         |
|----------------------------------------------------------------------------------------------------|---------|
| Baseline transmission probability <sup>a</sup>                                                     | 0.00015 |
| IDU-IDU interaction probability <sup>a</sup>                                                       | 98.8%   |
| Hazard ratio of infection due to needle sharing (D <sub>I</sub> or D <sub>E</sub> ) <sup>a,b</sup> | 12      |
| Awareness reduction factor (A <sub>I</sub> ) <sup>c</sup>                                          | 50%     |
| Treatment reduction factor (T <sub>I</sub> ) <sup>c</sup>                                          | 70%     |

189 <sup>a</sup> Calibrated parameters

190 <sup>b</sup> Infection due to needle sharing occurs at the situation where an infected IDU pairs with a susceptible IDU.

191 <sup>c</sup> Assumptions: awareness of the disease would decrease the probability of transmitting HCV to others by 50%; and  
 192 previous treatment history would decrease the probability of transmitting HCV to others by 70%.

193 Abbreviations: IDU, injection drug user.

194

195 **S1.4 HCV Disease Progression**

196

197 All newly infected individuals started with the acute phase of HCV. The acute infection lasted for  
 198 six months and ended with either a recovery at 25% chance or otherwise advancement to the  
 199 chronic phase of HCV disease (28). The natural history of chronic HCV was defined using a  
 200 Markov model (Figure 1). The chronic disease progressed through different stages of fibrosis, as  
 201 defined by Meta-Analysis of Histologic Data in Viral Hepatitis (METAVIR) scale units, F0 to F4. We  
 202 used meta-regression equations from 111 studies to estimate the progression of fibrosis (29).  
 203 Patients at METAVIR fibrosis score F3 and F4 could develop advanced diseases such as  
 204 decompensated cirrhosis, hepatocellular carcinoma (28, 30-40). Patients with decompensated  
 205 cirrhosis or hepatocellular carcinoma were eligible for receiving a liver transplant or they could die  
 206 because of high liver-related mortality (eTable 6) (15, 41-44). We assumed that patients while  
 207 inside prisons were not eligible for a liver transplant.

208

209 Disease progressed at the same rate for patients who failed to achieve SVR as in untreated  
 210 patients. Those who achieved SVR were assumed to not progress if they were not cirrhotic. In  
 211 cirrhotic patients, we assumed that the disease would progress even after achieving SVR, though  
 212 at a slower rate (28).

213

214 **eTable 6. Natural History Transition Probabilities**

| Model Parameters                                                           | Value                                                                                                                                                    |
|----------------------------------------------------------------------------|----------------------------------------------------------------------------------------------------------------------------------------------------------|
| <b>Equations Providing Fibrosis Progression Probabilities (Annual)(29)</b> |                                                                                                                                                          |
| F0 to F1                                                                   | $\exp[-2.0124 - (0.07589 \times duration) + (0.3247 \times 0.5) + (0.5063 \times f(\text{male})) + (0.4839 \times f(G1))]$                               |
| F1 to F2                                                                   | $\exp[-1.5387 - (0.06146 \times duration) + (0.8001 \times f(\text{excess alcohol}))]$                                                                   |
| F2 to F3                                                                   | $\exp[-1.6038 + (0.0172 \times \text{age at HCV}) - (0.05939 \times duration) + (0.4539 \times 0.19)]$                                                   |
| F3 to compensated cirrhosis (F4)                                           | $\exp[-2.2898 + (0.01689 \times \text{age at HCV}) - (0.03694 \times duration) + (0.5963 \times f(IDU)) + (1.1682 \times 0.31) - (0.4652 \times f(G1))]$ |
| <b>Transition Probabilities (Annual)</b>                                   |                                                                                                                                                          |
| F3 to hepatocellular carcinoma (30)                                        | 0.008                                                                                                                                                    |
| Compensated cirrhosis (F4) to decompensated cirrhosis (32)                 | 0.039                                                                                                                                                    |
| Compensated cirrhosis (F4) to hepatocellular carcinoma (32)                | 0.014                                                                                                                                                    |
| SVR after cirrhosis to decompensated cirrhosis (28)                        | 0.008                                                                                                                                                    |
| SVR after cirrhosis to hepatocellular carcinoma (28)                       | 0.005                                                                                                                                                    |
| Decompensated cirrhosis to hepatocellular carcinoma (40)                   | 0.068                                                                                                                                                    |
| Decompensated cirrhosis to liver transplant in general population (41, 45) | 0.023                                                                                                                                                    |
| Decompensated cirrhosis to liver transplant inside prisons (Assumption)    | 0                                                                                                                                                        |

|                                                                             |       |
|-----------------------------------------------------------------------------|-------|
| Decompensated cirrhosis (first year) to liver-related death (40)            | 0.182 |
| Decompensated cirrhosis (subsequent year) to liver-related death (40)       | 0.112 |
| Hepatocellular carcinoma to liver transplant in general population (42, 43) | 0.040 |
| Hepatocellular carcinoma to liver transplant inside prisons (Assumption)    | 0     |
| Hepatocellular carcinoma to liver-related death (32)                        | 0.427 |
| Liver transplant (first year) to liver-related death (44)                   | 0.116 |
| Liver transplant (subsequent year) to liver-related death (44)              | 0.044 |

- 215  $f(\text{male}) = 1$ , if patient is male; and 0 if patient is female.
- 216  $f(\text{G1}) = 1$ , if patient has hepatitis C virus (HCV) genotype 1; and 0 otherwise.
- 217  $f(\text{excess alcohol}) = 1$ , if patients has excess alcohol consumption; and 0 otherwise. The prevalence of excess alcohol
- 218 consumption was 24% for male inmates, 17% for female inmates, and 23% for general population (46).
- 219  $f(\text{IDU}) = 1$ , if patients are active injection drug users; and 0 otherwise.
- 220 Abbreviations: SVR, sustained virology response; METAVIR, meta-analysis of histologic data in viral hepatitis; F0–F4,
- 221 METAVIR fibrosis score.
- 222

## 223 **S1.5 HCV Diagnosis and Treatment**

224

225 Inside prisons, patients could get diagnosed with the implementation of one of the four screening  
226 scenarios. In risk-based screening scenario, we assumed that 75% of prisoners with active IDU or  
227 IDU history received HCV screening (eTable 7) (47). Our assumption is based on the Arrestee  
228 Drug Abuse Monitoring (ADAM) jail study, in which even when detainees were told that a survey  
229 on drug use will be confidential and the survey will be followed by urine testing, only 50% with  
230 opiates in urine disclosed their IDU. We conservatively assumed that 75% of IDU would admit to  
231 using drugs (our assumption favored risk-based screening, and hence provided a conservative  
232 estimate of ICERs of opt-out screening). In all opt-out screening scenarios, we assumed that the  
233 uptake rate was 90%, similar to that of HIV opt-out screening in prisons (48). We also assumed  
234 that all HCV tests were 100% sensitive and 100% specific, and HCV-infected chronic persons  
235 aware of their status would not be screened because their status wouldn't change without  
236 treatment.

237

238 Outside prisons, patients could get diagnosed following the current standard-of-care of HCV  
239 screening, which included birth-cohort screening, risk-based screening, and usual care (49, 50).  
240 We implemented the standard-of-care by probabilistically making unaware patients aware of their  
241 disease. We used a previously published study to implement the screening practice in the general  
242 community (eTable 7) (22).

243

244 Only patients who were aware of their status could get antiviral treatment. Following the current  
245 clinical practice (51), our model assigned treatment to patients with METAVIR fibrosis score F3  
246 and F4. We assumed that F0-F2 patients would receive APRI test every year and become eligible  
247 for treatment if they advanced to F3 state. According to the recent guidelines by Federal Bureau of  
248 Prison, HCV patients with APRI score > 1.0 or between 0.7 and 1.0 are prioritized for treatment  
249 (52). The cost of APRI is negligible and was not included. With the availability of cheaper generic  
250 drugs in 2030, we assumed that all patients irrespective of their fibrosis scores would get antiviral  
251 treatment (53). Furthermore, inside prisons, only inmates with remaining length of sentence of  
252 more than 12 months were eligible for treatment. We ran alternative scenario where all HCV  
253 positive, F0 to F4, were eligible for treatment if their length of sentence was more than 12 months  
254 (eTable 20).

255

256 Because of a limited treatment capacity in prisons, eligible patients were assigned treatment  
257 based on a published study—2.6% per month for patients in community and 4.1% per month for  
258 inmates (54). The probability of initiating treatment was higher in prisons because of better linkage  
259 to care than in the community (54). We also simulated a hypothetical scenario where every eligible  
260 candidate was treated at diagnoses (eTable 21).

261

262 We estimated the proportion of diagnosed HCV patients who were eligible for treatment with oral  
263 DAAs. In prisons, 11.5% inmates had contraindications to antiviral treatment and 8.5% inmates

264 declined treatment (55, 56). Therefore, 80% of the diagnosed prisoners were eligible for treatment.  
 265 In the general community, we assumed 74.3% of the patients were eligible for treatment with oral  
 266 DAAs, which also took into account access to insurance (57, 58).

267

268 We used the AASLD-IDSA guidelines to assign therapies to individuals according to their HCV  
 269 genotype, treatment history, and presence of cirrhosis (51). Efficiency data and duration of each  
 270 therapy were extracted from published clinical trials (eTable 8). Because the treatment  
 271 recommendations are in flux and being updated frequently, we used the efficacy data from  
 272 sofosbuvir-based therapies as a reference (59-66). Most of the recently approved regimens  
 273 reported similar efficacy data; therefore, other results and conclusions are applicable to all oral  
 274 therapies. We assumed that patients who failed to achieve SVR are eligible for another treatment  
 275 after a gap of 6 months. We restricted the number of retreatments after failing to achieve SVR to a  
 276 maximum of 2 times. SVR rates of 2<sup>nd</sup> re-treatment were assumed to be identical to that of 1<sup>st</sup>  
 277 re-treatment.

278

279 **eTable 7. Probability of Getting Diagnosed for Inmates and General**  
 280 **Population**

| Model Parameters                                                                                  | Value   |
|---------------------------------------------------------------------------------------------------|---------|
| <b>Uptake Rate of HCV Testing inside Prison</b>                                                   |         |
| Risk-based (47)                                                                                   | 75%     |
| Opt-out (48)                                                                                      | 90%     |
| <b>Probability of Becoming Aware of HCV under Standard-of-care by Disease Stage (Annual) (22)</b> |         |
| METAVIR score F0                                                                                  | 0.03700 |
| METAVIR score F1                                                                                  | 0.02971 |
| METAVIR score F2                                                                                  | 0.04218 |
| METAVIR score F3                                                                                  | 0.04604 |
| METAVIR score F4                                                                                  | 0.16259 |

281

We assumed that all patients with decompensated cirrhosis and hepatocellular carcinoma would be aware of their disease.

282

Abbreviations: METAVIR, meta-analysis of histologic data in viral hepatitis; F0–F4, METAVIR fibrosis score.

283

284 **eTable 8. Treatment Duration and Sustained Viral Response (SVR) Rates of**  
 285 **oral DAAs by Virus Genotype, Disease States, and Treatment History.**

286

Simplified regimens are generated according to AASLD/IDSA-Recommended

287

Therapies.

| Virus Genotype                  | Duration (Weeks)  | SVR Rates Non-Cirrhosis (F1-F3) | SVR Rates Cirrhosis (F4) | Ref.     |
|---------------------------------|-------------------|---------------------------------|--------------------------|----------|
| <b>Treatment-Naïve Patients</b> |                   |                                 |                          |          |
| G1                              | 8/12 <sup>a</sup> | 97%                             | 97%                      | (59, 60) |
| G2                              | 12                | 97%                             | 83%                      | (61)     |
| G3                              | 24                | 94%                             | 92%                      | (62)     |

|                                       |                    |     |     |      |
|---------------------------------------|--------------------|-----|-----|------|
| G4                                    | 24                 | 92% | 92% | (63) |
| <b>Treatment-Experienced Patients</b> |                    |     |     |      |
| G1                                    | 12/24 <sup>b</sup> | 95% | 99% | (64) |
| G2                                    | 12                 | 96% | 60% | (65) |
| G3                                    | 24                 | 85% | 60% | (62) |
| G4                                    | 12                 | 95% | 95% | (66) |

288 Abbreviations: DAA, Direct Antiviral Agents; AASLD, American Association for the Study of Liver Diseases; IDSA,  
289 Infectious Diseases Society of America; G1–4, genotype 1–4; METAVIR, meta-analysis of histologic data in viral hepatitis;  
290 F0-F4, METAVIR fibrosis score; SVR, sustained virologic response.

291 <sup>a</sup> In non-cirrhotic treatment-naïve patients, the duration of oral DAAs depends on patient's baseline HCV RNA. Those with  
292 HCV RNA less than 6 million IU/mL are considered for 8 weeks of treatment, and 12 weeks otherwise. Among this patient  
293 group, 57% of patients were eligible for 8 weeks of treatment.

294 <sup>b</sup> Patients with cirrhosis were assigned 24 weeks of treatment.

295

296 **S1.6 Arrest and Release of Prisoners**

297

298 We simulated movement of people from community to prisons and vice versa. At each cycle,  
 299 agents in our model could get arrested with some probability. We estimated the baseline crime  
 300 probabilities separately for people with and without incarceration history using the BJS data and  
 301 published surveys (eTable 9) (67-70). We estimated the length of sentence from BJS reports (5).  
 302 Because the *actual* length of stay in prisons is typically less than the *assigned* length of sentence,  
 303 we estimated the *actual* stay in prison by adjusting for the proportion of the assigned sentence  
 304 completed (eTable 10) (71). We assumed that patients with hepatocellular carcinoma or after a  
 305 liver transplant have 50% less likelihood to commit a crime and get arrested. In addition, we  
 306 assumed that people below the age 14 or over 70 would not get arrested. After completing the  
 307 assigned duration of sentence, inmates would transition in the community.

308

309 **eTable 9. Probability of Incarceration**

| Model Parameters                                                                                    |                                              | Value       |              |              |  |
|-----------------------------------------------------------------------------------------------------|----------------------------------------------|-------------|--------------|--------------|--|
| <b>Probability of Incarceration for Individuals without Incarceration History (Monthly) (67-69)</b> |                                              |             |              |              |  |
| <b>Age</b>                                                                                          | <b>Probability</b>                           |             |              |              |  |
| 18-19                                                                                               | 0.000234                                     |             |              |              |  |
| 20-24                                                                                               | 0.00083                                      |             |              |              |  |
| 25-29                                                                                               | 0.000978                                     |             |              |              |  |
| 30-34                                                                                               | 0.001034                                     |             |              |              |  |
| 35-39                                                                                               | 0.000916                                     |             |              |              |  |
| 40-44                                                                                               | 0.000806                                     |             |              |              |  |
| 45-49                                                                                               | 0.000519                                     |             |              |              |  |
| 50-54                                                                                               | 0.000312                                     |             |              |              |  |
| 55-59                                                                                               | 0.000187                                     |             |              |              |  |
| 60-64                                                                                               | 0.000115                                     |             |              |              |  |
| 65-70                                                                                               | 4.12E-05                                     |             |              |              |  |
| <b>Probability of Incarceration for Individuals within 36 Months after Release (Monthly) (70)</b>   |                                              |             |              |              |  |
| <b>Age at Release</b>                                                                               | <b>Probability (By Months after Release)</b> |             |              |              |  |
|                                                                                                     | 0-6 months                                   | 6-12 months | 12-24 months | 24-36 months |  |
| 18-24                                                                                               | 0.00986                                      | 0.00534     | 0.00415      | 0.00218      |  |
| 25-29                                                                                               | 0.00879                                      | 0.00475     | 0.0037       | 0.00194      |  |
| 30-34                                                                                               | 0.00846                                      | 0.00458     | 0.00356      | 0.00187      |  |
| 35-39                                                                                               | 0.00784                                      | 0.00424     | 0.0033       | 0.00173      |  |
| 40-44                                                                                               | 0.00599                                      | 0.00324     | 0.00252      | 0.00132      |  |
| 45 or older                                                                                         | 0.00553                                      | 0.00299     | 0.00233      | 0.00122      |  |

310

311 **eTable 10. Length of Sentence**

| Model Parameters | Value |
|------------------|-------|
|------------------|-------|

| <b>Sentence Length (Years) at Admission (5)</b>     | <b>Proportion</b>                                  |
|-----------------------------------------------------|----------------------------------------------------|
| <2                                                  | 13.70%                                             |
| 2-4                                                 | 43.50%                                             |
| 5-9                                                 | 24.40%                                             |
| 10-19                                               | 12.30%                                             |
| 20-49                                               | 4.10%                                              |
| 50-99                                               | 0.40%                                              |
| 100                                                 | 0.10%                                              |
| Life/death                                          | 1.50%                                              |
| <b>Assigned Length of Sentence at Admission(71)</b> | <b>Actual Length served (% of assigned length)</b> |
| <3 months                                           | 90%                                                |
| 3-12 months                                         | 80%                                                |
| 1-3 years                                           | 70%                                                |
| 3-7 years                                           | 60%                                                |
| >7 years                                            | 50%                                                |

312



313 **S1.7 Injection Drug Use**

314

315 We modeled a dynamic change in behavior with respect to injection drug use. Active IDUs could  
316 stop injecting drugs. Similarly, inactive IDUs or persons between age 15 and 50 with no history of  
317 injecting drugs could start injecting drugs. In our model, we assigned probabilities of initiating and  
318 quitting injection drugs per month. We assumed that non-IDUs who have IDU history would have a  
319 higher probability of resuming drug use than those who did not have any IDU history. Because  
320 these parameters are not known and difficult to estimate in real life, we used a calibration process  
321 to estimate their values. We ran our model with several combinations of these unknown  
322 parameters. We selected the combination that kept the number of active and former IDUs stable  
323 over time, and also matched model's projected annual incidence of drug use with the reported  
324 value of 0.115% per person-year (72). During our calibration process, we assumed that the  
325 number of IDUs remain stable over time because some active IDU would stop injecting and other  
326 inactive IDUs could start injecting. The estimated monthly probabilities of initiating and quitting  
327 injection drugs were 0.00885% and 0.558%. The corresponding annual probabilities were 0.106%  
328 and 6.494%. The hazard ratio of initiating IDU in persons with IDU history equal to 20. The  
329 standard Calibration Reporting Checklist is defined as: 1) Target data and corresponding model  
330 output: annual incidence of drug use of 0.115% per person-year; 2) Search algorithm: trial and  
331 error; 3) goodness of fit metric: relative distance of within 5%; 4) Acceptance criteria: within 5% of  
332 target value; 5) Stopping rule: manual; and 6) Validation: our calibrated model was further  
333 validated by comparing the prevalence of active IDUs from model with known studies (6, 7). We  
334 found that the prevalence of IDUs remained stable at 26% inside prisons and at 1.2% in the  
335 general community.

336

337 **S1.8 Cost and Quality-of-Life Weights**

338

339 Cost-related model parameters included HCV screening costs, antiviral treatment costs, and  
 340 chronic hepatitis C management costs.

341

342 The cost of HCV screening consisted of the costs of anti-HCV antibody test, HCV RNA test, HCV  
 343 genotype assay and FibroSure test (eTable 11) (73, 74). Persons who tested positive on anti-HCV  
 344 antibody test were given HCV-RNA test, and among those who were viremic were tested for HCV  
 345 genotype. To determine treatment eligibility, we assumed that all viremic persons got FibroSure  
 346 test to determine their fibrosis stage. We assumed that F0-F2 patients would receive APRI test  
 347 every year, and the cost of APRI is negligible and was not included (52).

348

349 The cost of antiviral treatment was determined by the duration and combination of drug regimens,  
 350 which was dependent on patient’s HCV genotype, prior treatment history, and fibrosis stage  
 351 (eTable 8). We used the weekly wholesale acquisition costs (WAC) of sofosbuvir-based regimens  
 352 in the base case, and conducted sensitivity analyses using 46% discount of WAC and the average  
 353 wholesale price (eTable 11) (75-77). Average wholesale price was assumed to be 20% higher  
 354 than the WAC. HCV treatment is influx and several alternatives are available (and more will be  
 355 available in future); however, our base case results are applicable to alternative therapies as well  
 356 because they are priced similar to sofosbuvir-based treatments.

357

358 We assigned health-related quality-of-life (QOL) weights to each person, which were dependent  
 359 on liver health, age, sex and injection drug use (eTable 14). We assumed the QOL of patients who  
 360 achieved SVR were equivalent to uninfected people if they had F0 or F1 METAVIR scores, and  
 361 worse than healthy people, otherwise.

362

363

**eTable 11. Cost Parameters (In 2014 US Dollars)**

| <b>Model Parameters</b>                      | <b>Value (\$)</b> |
|----------------------------------------------|-------------------|
| <b>HCV Management Costs (Annual)</b>         |                   |
| F0, F1 (78, 79)                              | 720               |
| F2 (78, 79)                                  | 732               |
| F3 (78, 79)                                  | 1500              |
| Compensated cirrhosis (F4) (79)              | 1740              |
| Decompensated cirrhosis (79)                 | 19 380            |
| Hepatocellular carcinoma (79)                | 35 652            |
| Liver transplant, first year (79)            | 105 269           |
| Liver transplant, subsequent year (79)       | 27 060            |
| <b>HCV Test Costs (1-time)</b>               |                   |
| HCV ELISA test (anti-HCV antibody test) (73) | 33                |

|                                               |      |
|-----------------------------------------------|------|
| Quantitative HCV RNA (73)                     | 92   |
| HCV Genotype assay (73)                       | 408  |
| FibroSure test (74)                           | 250  |
| Cost per case identified outside prisons (22) | 2873 |
| <b>HCV Treatment Costs (Weekly) (75)</b>      |      |
| Ribavirin                                     | 309  |
| Sofosbuvir                                    | 7000 |
| Ledipasvir                                    | 1125 |

364 Abbreviations: SVR, sustained virology response; METAVIR, meta-analysis of histologic data in viral hepatitis; F0–F4,  
365 METAVIR fibrosis score; HCC, hepatocellular carcinoma; ELISA, enzyme-linked immunosorbant analysis; SVR, sustained  
366 viral response.

367

368 **eTable 12. Health-Related and Age-Related Quality-of-Life Inputs**

| Model Parameters                                | Value |        |
|-------------------------------------------------|-------|--------|
| <b>Health-Related Quality-of-Life Weights</b>   |       |        |
| METAVIR score F0, F1 (80)                       | 0.93  |        |
| METAVIR score F2, F3 (80)                       | 0.93  |        |
| Compensated cirrhosis (METAVIR score F4) (80)   | 0.90  |        |
| Decompensated cirrhosis (80)                    | 0.80  |        |
| Hepatocellular carcinoma (80)                   | 0.79  |        |
| Liver transplant (first year) (80)              | 0.84  |        |
| Liver transplant (subsequent year) (80)         | 0.84  |        |
| Post SVR (F0-F1) (Assumption)                   | 1.00  |        |
| Post SVR (F2-F4) (Assumption)                   | 0.93  |        |
| Antiviral therapy multiplier, no anemia (81)    | 0.90  |        |
| Antiviral therapy multiplier, anemia            | 0.95  |        |
| Anemia multiplier (82)                          | 0.83  |        |
| Active injection drug use multiplier (72, 83)   | 0.83  |        |
| Former injection drug use multiplier            | 1.00  |        |
| <b>Age-Related Quality-of-Life Weights (84)</b> |       |        |
| Age Group                                       | Male  | Female |
| 0–29                                            | 0.928 | 0.913  |
| 30–39                                           | 0.918 | 0.893  |
| 40–49                                           | 0.887 | 0.863  |
| 50–59                                           | 0.861 | 0.837  |
| 60–69                                           | 0.84  | 0.811  |
| 70–79                                           | 0.802 | 0.771  |
| >80                                             | 0.782 | 0.724  |

369 Abbreviations: METAVIR, meta-analysis of histologic data in viral hepatitis; F0-F4, METAVIR fibrosis score; SVR,  
370 sustained virologic response.  
371

## Supplementary Appendix 2: Model Validation

### S2.1 Natural History of HCV

To validate the natural history of our model, we compared the intermediate model outcomes with a large clinical study of HCV disease progression (85). We ran a submodel with the natural history Markov chain in patients with similar demographic and health characteristics (mean age 48; fibrosis score: F3, 27% and F4, 74%; SVR and no SVR) as included in the clinical study. We compared our model's 10-year projected incidence rates of decompensated cirrhosis, hepatocellular carcinoma and liver-related death/liver transplantation with the reported values (eTable 13) (85). The projected incidence rates were within the reported 95% confidence intervals, except for that the model underestimated 10-year cumulative incidence of decompensated cirrhosis in patients who failed to achieve SVR.

**eTable 13. Validation of the Natural History of HCV**

| Initial Treatment Response       | Subsequent Liver Complication | 10-year Cumulative Incidence |                  |
|----------------------------------|-------------------------------|------------------------------|------------------|
|                                  |                               | van der Meer et al.          | Model Prediction |
| Patients who did not achieve SVR | DC                            | 29.9% (95% CI: 24.3–35.5%)   | 23.9%            |
|                                  | HCC                           | 21.8% (95% CI: 16.6–27.0%)   | 22.3%            |
|                                  | LRD plus LT                   | 27.4% (95% CI: 22.0–32.8%)   | 26.5%            |
| Patients who achieved SVR        | DC                            | 2.1% (95% CI: 0–4.5%)        | 1.4%             |
|                                  | HCC                           | 5.1% (95% CI: 1.3–8.9%)      | 3.7%             |
|                                  | LRD plus LT                   | 1.9% (95% CI: 0–4.1%)        | 3.6%             |

Abbreviations: SVR, sustained virologic response; DC, decompensated cirrhosis; HCC, hepatocellular carcinoma; LRD, liver-related death; LT, liver transplant; CI, confidence interval.

390 **S2.2 Arrest and Release of Prisoners**

391

392 We performed external validation by comparing our model’s projected number of admissions to  
 393 prisons with BJS data (71, 86, 87). Specifically, we compared the admission turnover rate, which  
 394 is the ratio of the number of new court commitments during a year, divided by the total sentenced  
 395 prisoners at the end of last year. The predicted admission turnover rates were between 28—30%,  
 396 which matched with reference value. Because BJS reports provide data until year 2012, we  
 397 started our model in year 2009 to validate our model’s projected number of admissions and  
 398 releases during 2009–2012 (eTable 14).

399

400 **eTable 14. Validation of Admission and Release of Prisoners**

| Year | BJS reports(5, 67, 86, 87) |                                   | Model prediction        |                      |
|------|----------------------------|-----------------------------------|-------------------------|----------------------|
|      | Total Prison Population    | Arrest Turnover Rate <sup>a</sup> | Total Prison Population | Arrest Turnover Rate |
| 2009 | 1 615 487                  | 29.40%                            | 1 602 300               | 28.11%               |
| 2010 | 1 613 803                  | 28.40%                            | 1 602 895               | 29.31%               |
| 2011 | 1 598 968                  | 28.43%                            | 1 618 621               | 29.26%               |
| 2012 | 1 570 397                  | 28.31%                            | 1 645 211               | 29.70%               |

401

<sup>a</sup> Arrest turnover rate is calculated by dividing number of arrested prisoners during year X by total prison population at the  
 402 end of year (X-1).

402

403

Abbreviations: BJS, bureau of justice statistics.

404

405 **Supplementary Appendix 3: Additional Results**

406

407 **S3.1 Additional Base-case Results**

408

409 Our model projected that the number of HCV infections averted would peak between 2020 and  
410 2024 and decline afterwards (eFigure 1). Interventions in prisons would reduce the number of  
411 HCV-infected people in prisons over time, and the benefits of screening will peak around year  
412 2035 and decline afterwards (eFigure 2).

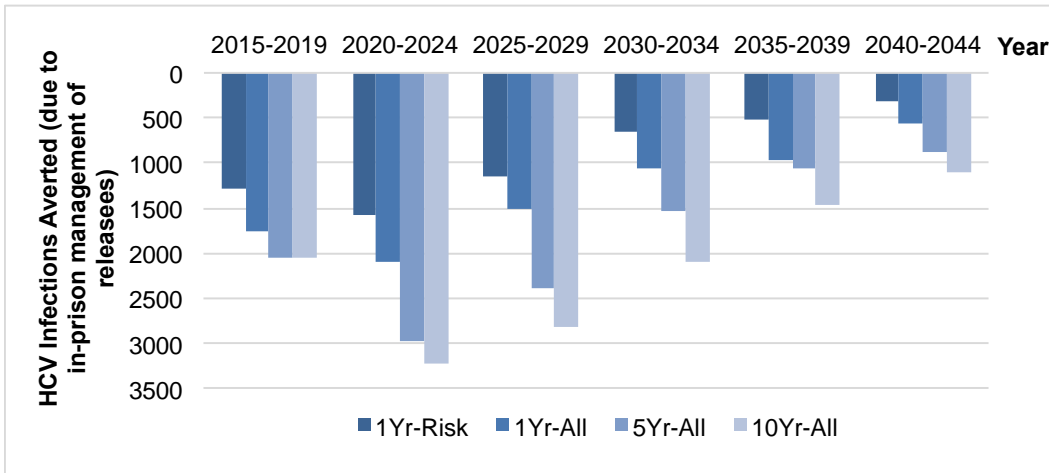

413

414 **eFigure 1. HCV Infections Averted over Time**

415

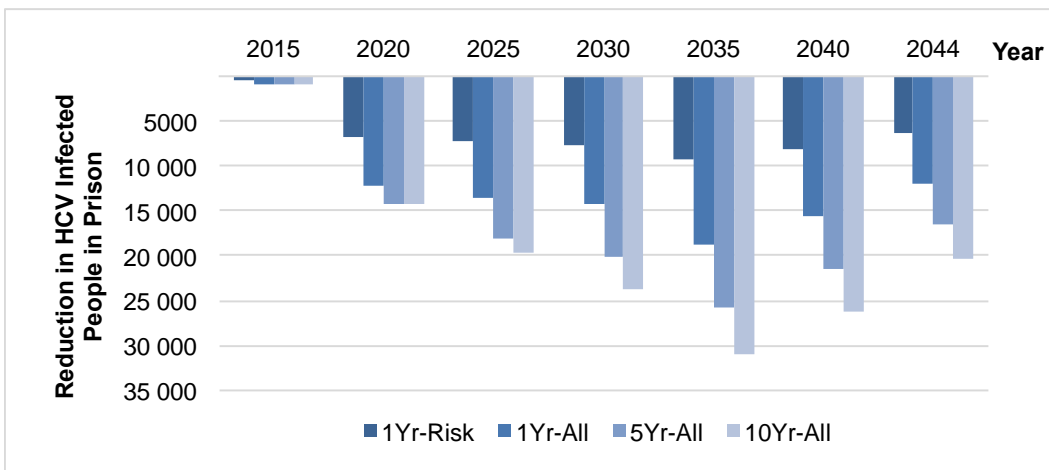

416

417 **eFigure 2. Reduction in HCV Infected People in Prison over Time**

418

419 **Budget Impact on Prison System**

420 We estimated the budget needed to treat HCV patients for all screening scenarios and compared  
421 it with the current healthcare spending in US prisons. Total Federal and state prisons spending in  
422 2014 Dollar was estimated at \$54.72 and \$6.86 billion, respectively (88, 89). Of the total prison  
423 budget, 15%–17.7% was spent of healthcare, which is \$9.24–\$10.88 billion. Therefore, the

424 first-year budget needed to implement risk-based and opt-out screening followed by treatment with  
 425 DAAs would require an additional 9.7% and 12.4% over the current healthcare budget,  
 426 respectively.  
 427

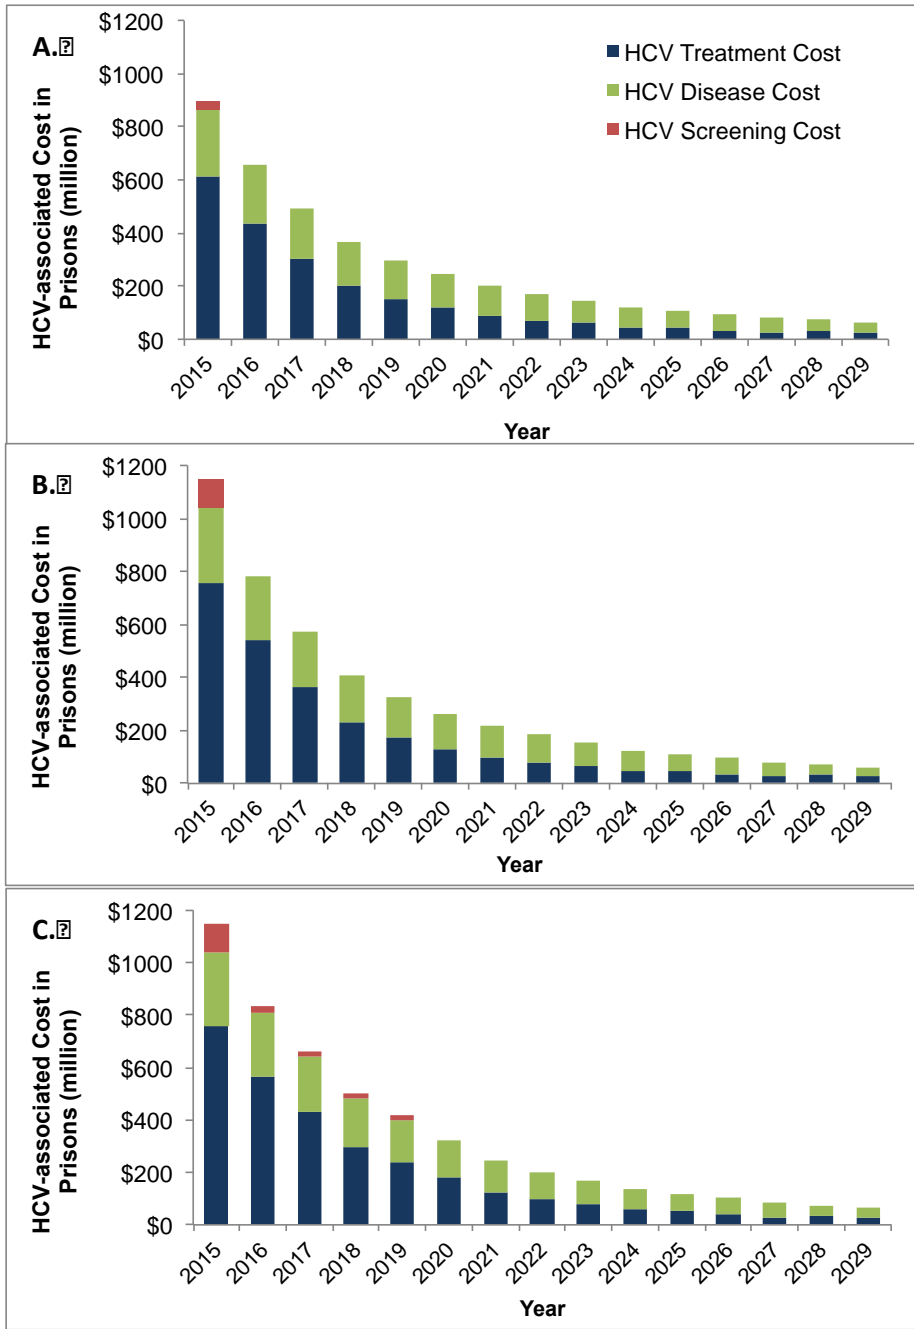

428 **eFigure 3. Total Cost of HCV Screening and Treatment in Prisons from 2015**  
 429 **to 2029.** The budget needed to screen, treat HCV infection, and manage chronic hepatitis C in  
 430 prisons under (A) 1-time risk-based screening of currently incarcerated and entrants who were  
 431 active or former IDUs for 1 year (1Yr-Risk), (B) 1-time opt-out universal screening of currently  
 432



433 incarcerated inmates and entrants for 1 years (1Yr-All scenario), and (C) for 5-years (5-Yr-All  
434 scenario).  
435

436 **S3.2 Sensitivity Analyses**

437 We ran 1-way sensitivity analysis on a total of 64 model parameters. We presented new infections  
 438 averted, liver-related deaths averted, ICERs, 1-year and 15-year prison budget impact for different  
 439 screening scenarios (eTables 15–19).

440

441 **eTable 15. Results of 1-Way Sensitivity Analysis Showing New Infections**  
 442 **Averted**

| Parameter                                                                   | Value (Low / High) | New Infections<br>No Screening | New Infections Averted <sup>a</sup><br>(Compared with No Screening) |             |               |               |
|-----------------------------------------------------------------------------|--------------------|--------------------------------|---------------------------------------------------------------------|-------------|---------------|---------------|
|                                                                             |                    |                                | 1Yr-Risk                                                            | 1Yr-All     | 5Yr-All       | 10Yr-All      |
| <b>Base Case</b>                                                            |                    | <b>166 084</b>                 | <b>5508</b>                                                         | <b>8041</b> | <b>11 001</b> | <b>12 603</b> |
| <b>Transition Probabilities<br/>(Annually)</b>                              |                    |                                |                                                                     |             |               |               |
| F0 to F1 <sup>b</sup>                                                       | 0.104              | <b>167 911</b>                 | 6088                                                                | 7965        | 11 230        | 13 000        |
|                                                                             | 0.130              | <b>168 113</b>                 | 6683                                                                | 9430        | 11 627        | 13 748        |
| F1 to F2 <sup>b</sup>                                                       | 0.075              | <b>169 429</b>                 | 6134                                                                | 8011        | 11 459        | 13 458        |
|                                                                             | 0.096              | <b>167 415</b>                 | 6164                                                                | 9063        | 11 612        | 13 824        |
| F2 to F3 <sup>b</sup>                                                       | 0.109              | <b>165 710</b>                 | 5813                                                                | 8362        | 11 795        | 13 153        |
|                                                                             | 0.133              | <b>163 490</b>                 | 6531                                                                | 8835        | 11 337        | 12 924        |
| F3 to compensated cirrhosis<br>(F4) <sup>b</sup>                            | 0.104              | <b>163 921</b>                 | 5340                                                                | 8346        | 11 566        | 13 122        |
|                                                                             | 0.129              | <b>161 937</b>                 | 5279                                                                | 7950        | 11 032        | 12 695        |
| F3 to hepatocellular carcinoma                                              | 0.003              | <b>168 487</b>                 | 5951                                                                | 9262        | 11 795        | 13 748        |
|                                                                             | 0.014              | <b>164 672</b>                 | 5676                                                                | 9109        | 11 017        | 13 137        |
| Compensated cirrhosis (F4) to<br>decompensated cirrhosis                    | 0.010              | <b>170 596</b>                 | 6027                                                                | 8240        | 11 017        | 12 726        |
|                                                                             | 0.039              | <b>164 302</b>                 | 5707                                                                | 8423        | 10 635        | 12 466        |
| Compensated cirrhosis (F4) to<br>hepatocellular carcinoma                   | 0.010              | <b>172 054</b>                 | 6454                                                                | 8987        | 12 191        | 13 809        |
|                                                                             | 0.079              | <b>156 482</b>                 | 5890                                                                | 8041        | 11 047        | 12 634        |
| Decompensated cirrhosis to<br>hepatocellular carcinoma <sup>2</sup>         | 0.030              | <b>166 664</b>                 | 5356                                                                | 7873        | 10 833        | 12 893        |
|                                                                             | 0.083              | <b>166 549</b>                 | 5661                                                                | 8835        | 11 368        | 12 878        |
| Decompensated cirrhosis to liver<br>transplant <sup>2</sup>                 | 0.010              | <b>166 301</b>                 | 6668                                                                | 8575        | 11 535        | 13 168        |
|                                                                             | 0.062              | <b>166 770</b>                 | 6470                                                                | 7339        | 11 245        | 13 244        |
| Decompensated cirrhosis (first<br>year) to liver-related death <sup>2</sup> | 0.065              | <b>167 224</b>                 | 5752                                                                | 9033        | 11 886        | 13 153        |
|                                                                             | 0.190              | <b>166 744</b>                 | 6073                                                                | 9155        | 11 642        | 13 397        |
| Decompensated cirrhosis<br>(subsequent year) to liver-related<br>death      | 0.065              | <b>167 713</b>                 | 5890                                                                | 8636        | 11 535        | 13 534        |
|                                                                             | 0.190              | <b>164 558</b>                 | 6454                                                                | 8301        | 11 383        | 12 939        |
| Hepatocellular carcinoma to liver<br>transplant                             | 0.000              | <b>164 840</b>                 | 6103                                                                | 7858        | 10 818        | 12 298        |
|                                                                             | 0.140              | <b>168 693</b>                 | 5600                                                                | 9002        | 11 596        | 13 229        |
| Hepatocellular carcinoma to<br>liver-related death                          | 0.330              | <b>167 453</b>                 | 5478                                                                | 7614        | 10 910        | 12 527        |
|                                                                             | 0.860              | <b>162 632</b>                 | 5340                                                                | 8453        | 10 254        | 12 405        |

|                                                                     |              |                |      |        |        |        |
|---------------------------------------------------------------------|--------------|----------------|------|--------|--------|--------|
| Liver transplant (first year) to liver-related death                | 0.060        | <b>166 652</b> | 6134 | 8438   | 10 910 | 13 107 |
|                                                                     | 0.420        | <b>165 668</b> | 6027 | 8178   | 11 825 | 13 290 |
| Liver transplant (subsequent year) to liver-related death           | 0.024        | <b>166 782</b> | 5417 | 8117   | 11 413 | 12 970 |
|                                                                     | 0.110        | <b>165 657</b> | 5447 | 7965   | 11 078 | 13 031 |
| SVR after cirrhosis to decompensated cirrhosis                      | 0.002        | <b>166 084</b> | 5508 | 8041   | 11 001 | 12 603 |
|                                                                     | 0.036        | <b>169 345</b> | 5920 | 8819   | 10 772 | 12 573 |
| SVR after cirrhosis to hepatocellular carcinoma                     | 0.002        | <b>166 080</b> | 6042 | 8301   | 11 963 | 13 626 |
|                                                                     | 0.013        | <b>167 327</b> | 6821 | 8926   | 11 764 | 13 992 |
| <b>Agent's Behavior Inputs</b>                                      |              |                |      |        |        |        |
| Uptake rate of HCV testing in prison under risk-based scenario      | 0.5          | <b>166 084</b> | 3860 | 8041   | 11 001 | 12 603 |
|                                                                     | 1.0          | <b>166 084</b> | 7492 | 8041   | 11 001 | 12 603 |
| Uptake rate of HCV testing in prison under opt-out scenarios        | 0.8          | <b>166 084</b> | 5508 | 6836   | 9903   | 11 657 |
|                                                                     | 1            | <b>166 084</b> | 5508 | 8713   | 11 535 | 13 092 |
| F0 HCV diagnosis probability                                        | 0.02787      | <b>167 842</b> | 6424 | 8346   | 11 352 | 13 214 |
|                                                                     | 0.04606      | <b>165 615</b> | 5997 | 8911   | 11 276 | 13 260 |
| F1 HCV diagnosis probability                                        | 0.02236      | <b>167 980</b> | 5524 | 8453   | 10 818 | 12 603 |
|                                                                     | 0.03702      | <b>164 844</b> | 6012 | 8285   | 10 727 | 12 375 |
| F2 HCV diagnosis probability                                        | 0.03179      | <b>168 739</b> | 6103 | 8468   | 11 261 | 12 848 |
|                                                                     | 0.05246      | <b>164 108</b> | 5936 | 8133   | 10 177 | 12 573 |
| F3 HCV diagnosis probability                                        | 0.03471      | <b>169 002</b> | 6286 | 8911   | 11 581 | 13 717 |
|                                                                     | 0.05724      | <b>164 535</b> | 5432 | 8240   | 10 681 | 12 451 |
| F4 HCV diagnosis probability                                        | 0.12439      | <b>169 147</b> | 6515 | 8621   | 11 810 | 13 702 |
|                                                                     | 0.19926      | <b>163 982</b> | 5661 | 8117   | 10 742 | 11 932 |
| Probability of quitting IDU (monthly)                               | 0.004967     | <b>174 628</b> | 6744 | 9933   | 12 329 | 14 465 |
|                                                                     | 0.006655     | <b>156 421</b> | 5264 | 7400   | 9689   | 11 368 |
| Treatment initiation probability per month (prisoners) <sup>2</sup> | 0.036        | <b>166 687</b> | 5569 | 8529   | 11 413 | 13 153 |
|                                                                     | 0.046        | <b>166 629</b> | 6180 | 8484   | 11 764 | 13 733 |
| Treatment initiation probability per month (general population)     | 0.023        | <b>167 709</b> | 6149 | 8102   | 11 154 | 12 741 |
|                                                                     | 0.029        | <b>164 867</b> | 5981 | 8575   | 11 337 | 13 076 |
| Baseline crime probability                                          | 10% decrease | <b>170 219</b> | 5035 | 7171   | 9292   | 10 833 |
|                                                                     | 10% increase | <b>162 204</b> | 5386 | 8957   | 11 520 | 13 427 |
| HCV transmission probability                                        | 0.00005      | <b>93 088</b>  | 3158 | 4761   | 6241   | 6775   |
|                                                                     | 0.00025      | <b>255 254</b> | 9979 | 13 412 | 17 578 | 21 087 |
| Awareness reduction factor                                          | 0.25         | <b>208 632</b> | 4715 | 6485   | 8316   | 10 711 |
|                                                                     | 0.75         | <b>126 118</b> | 7568 | 10 208 | 13 794 | 15 518 |
| Treatment reduction factor                                          | 0            | <b>167 987</b> | 6470 | 9140   | 12 039 | 13 824 |
|                                                                     | 1            | <b>165 912</b> | 6180 | 7980   | 11 352 | 13 290 |
| <b>HCV-associated Agent Characteristics</b>                         |              |                |      |        |        |        |
| HCV prevalence among newborn                                        | 0.000061     | <b>166 213</b> | 6195 | 9262   | 11 673 | 13 565 |
|                                                                     | 0.00018      | <b>166 816</b> | 5844 | 9216   | 11 581 | 13 534 |

|                                                                     |                     |                |      |      |        |        |
|---------------------------------------------------------------------|---------------------|----------------|------|------|--------|--------|
| Proportion of patients aware of HCV infection (General population)  | 25%                 | <b>193 736</b> | 6592 | 9521 | 13 290 | 15 289 |
|                                                                     | 75%                 | <b>139 408</b> | 4455 | 6500 | 9109   | 10 284 |
| Proportion of patients aware of HCV infection (Prisoners)           | 10%                 | <b>169 200</b> | 6775 | 9475 | 12 466 | 13 412 |
|                                                                     | 50%                 | <b>161 838</b> | 5356 | 6576 | 8682   | 10 025 |
| Proportion of treatment-experienced patients initially <sup>2</sup> | 0.29                | <b>166 538</b> | 5432 | 7248 | 10 696 | 12 359 |
|                                                                     | 0.49                | <b>167 392</b> | 6180 | 9063 | 11 612 | 13 305 |
|                                                                     | Community:          |                |      |      |        |        |
|                                                                     | 30%, Prisons:       | <b>169 868</b> | 5279 | 7278 | 10 299 | 11 947 |
| Proportion of diagnosed patients eligible for treatment             | 47%                 |                |      |      |        |        |
|                                                                     | Community:          |                |      |      |        |        |
|                                                                     | 50%, Prisons:       | <b>158 565</b> | 5951 | 8621 | 10 483 | 13 092 |
|                                                                     | 78%                 |                |      |      |        |        |
| Additional treatment eligibility with interferon-free regimen       | 0.12975             | <b>168 510</b> | 5463 | 8896 | 10 650 | 12 878 |
|                                                                     | 0.21625             | <b>164 661</b> | 6164 | 8377 | 11 200 | 13 412 |
| <b>Miscellaneous</b>                                                |                     |                |      |      |        |        |
| Drug price                                                          | 46% discount of WAC | <b>166 084</b> | 5508 | 8041 | 11 001 | 12 603 |
|                                                                     | AWP                 | <b>166 084</b> | 5508 | 8041 | 11 001 | 12 603 |
| Self-clearance probability after acute infection                    | 0.23                | <b>167 140</b> | 5752 | 8545 | 11 352 | 13 092 |
|                                                                     | 0.28                | <b>165 176</b> | 6470 | 8728 | 11 749 | 13 275 |
| SMR of inmates                                                      | 0.77                | <b>166 851</b> | 6134 | 8377 | 12 115 | 13 687 |
|                                                                     | 0.94                | <b>165 946</b> | 5813 | 8148 | 11 306 | 13 199 |
| SVR rates of oral DAAs                                              | 0% decrease         | <b>166 084</b> | 5508 | 8041 | 11 001 | 12 603 |
|                                                                     | 15% decrease        | <b>166 477</b> | 6225 | 8529 | 10 910 | 13 549 |
| Generic drug availability year                                      | 2025                | <b>162 021</b> | 6271 | 8438 | 11 520 | 13 595 |
|                                                                     | 2032                | <b>167 743</b> | 5600 | 8117 | 10 925 | 12 436 |
| Time horizon                                                        | 20 years            | <b>143 818</b> | 4776 | 6439 | 9018   | 10 132 |
|                                                                     | 40 years            | <b>175 273</b> | 5859 | 8453 | 11 581 | 13 549 |

443 <sup>a</sup> Infections averted in comparison with no screening were presented in the sensitivity analysis. Because the overall  
444 number of infections under no screening also changed for each parameter in the sensitivity analysis, the relative number of  
445 infections averted in the base case may not necessarily remain within the range obtained by low or high parameter values.  
446 Second, the trends may look inconsistent if the results obtained by low and high parameters are directly compared to each  
447 other. Third, because of small differences across strategies, results could be influenced by first-order uncertainty that could  
448 result in inconsistent trends.

449 <sup>b</sup> In the base case, we simulated fibrosis progression by using regression equations (eTable 6); however, for 1-way  
450 sensitivity analysis, we used fixed upper and lower values of fibrosis progression instead of equations.  
451 Abbreviations: DAA, direct anti-viral agent; HCV, hepatitis C virus; METAVIR, meta-analysis of histologic data in viral  
452 hepatitis; F0-F4, METAVIR fibrosis score; SVR, sustained virologic response; SMR, standardized mortality ratio; WAC,  
453 wholesale acquisition cost; AWP, average wholesale price.

454  
455  
456

**eTable 16. Results of 1-Way Sensitivity Analysis Showing Liver-Related Deaths Averted**

| Parameter                                                        | Value (low / high) | Liver-Related  | Liver-Related Deaths Averted <sup>a</sup> |             |               |               |
|------------------------------------------------------------------|--------------------|----------------|-------------------------------------------|-------------|---------------|---------------|
|                                                                  |                    | Deaths         | (Compared with No Screening)              |             |               |               |
|                                                                  |                    | No Screening   | 1Yr-Risk                                  | 1Yr-All     | 5Yr-All       | 10Yr-All      |
| <b>Base Case</b>                                                 |                    | <b>780 803</b> | <b>4303</b>                               | <b>7950</b> | <b>10 360</b> | <b>11 734</b> |
| <b>Transition Probabilities (Annually)</b>                       |                    |                |                                           |             |               |               |
| F0 to F1 <sup>b</sup>                                            | 0.104              | <b>769 088</b> | 3891                                      | 6775        | 9247          | 10 406        |
|                                                                  | 0.130              | <b>774 909</b> | 4013                                      | 7614        | 10 116        | 11 123        |
| F1 to F2 <sup>b</sup>                                            | 0.075              | <b>759 666</b> | 3982                                      | 7309        | 9353          | 10 666        |
|                                                                  | 0.096              | <b>775 767</b> | 4379                                      | 7522        | 10 025        | 11 413        |
| F2 to F3 <sup>b</sup>                                            | 0.109              | <b>801 367</b> | 4791                                      | 8377        | 11 368        | 12 695        |
|                                                                  | 0.133              | <b>822 370</b> | 4700                                      | 8941        | 11 657        | 13 046        |
| F3 to compensated cirrhosis (F4) <sup>b</sup>                    | 0.104              | <b>853 310</b> | 4700                                      | 8194        | 11 169        | 12 573        |
|                                                                  | 0.129              | <b>882 694</b> | 4425                                      | 8499        | 11 322        | 12 680        |
| F3 to hepatocellular carcinoma                                   | 0.003              | <b>745 964</b> | 4120                                      | 8072        | 10 025        | 11 398        |
|                                                                  | 0.014              | <b>818 029</b> | 4852                                      | 8575        | 10 833        | 12 466        |
| Compensated cirrhosis (F4) to decompensated cirrhosis            | 0.010              | <b>683 973</b> | 3845                                      | 6912        | 9140          | 10 299        |
|                                                                  | 0.039              | <b>818 594</b> | 4715                                      | 8407        | 11 291        | 12 909        |
| Compensated cirrhosis (F4) to hepatocellular carcinoma           | 0.010              | <b>689 046</b> | 3616                                      | 6119        | 8545          | 9811          |
|                                                                  | 0.079              | <b>896 320</b> | 6027                                      | 10 147      | 13 733        | 16 006        |
| Decompensated cirrhosis to hepatocellular carcinoma              | 0.030              | <b>776 164</b> | 4379                                      | 7995        | 10 376        | 11 902        |
|                                                                  | 0.083              | <b>780 165</b> | 4394                                      | 7767        | 10 345        | 11 642        |
| Decompensated cirrhosis to liver transplant                      | 0.010              | <b>787 032</b> | 4440                                      | 7965        | 10 803        | 12 191        |
|                                                                  | 0.062              | <b>764 381</b> | 4639                                      | 8133        | 10 696        | 11 932        |
| Decompensated cirrhosis (first year) to liver-related death      | 0.065              | <b>789 134</b> | 4455                                      | 8133        | 10 849        | 11 963        |
|                                                                  | 0.190              | <b>780 249</b> | 4639                                      | 8209        | 10 803        | 12 100        |
| Decompensated cirrhosis (subsequent year) to liver-related death | 0.065              | <b>773 673</b> | 4227                                      | 7538        | 10 223        | 11 673        |
|                                                                  | 0.190              | <b>778 727</b> | 4806                                      | 8590        | 11 093        | 12 680        |
| Hepatocellular carcinoma to liver transplant                     | 0.000              | <b>790 663</b> | 4822                                      | 7889        | 10 620        | 11 917        |
|                                                                  | 0.140              | <b>758 064</b> | 4318                                      | 7675        | 10 010        | 11 306        |
| Hepatocellular carcinoma to liver-related death                  | 0.330              | <b>782 782</b> | 4150                                      | 7507        | 9948          | 11 306        |
|                                                                  | 0.860              | <b>765 884</b> | 3799                                      | 7767        | 10 452        | 12 115        |
| Liver transplant (first year) to liver-related death             | 0.060              | <b>779 445</b> | 4593                                      | 8270        | 11 017        | 12 527        |
|                                                                  | 0.420              | <b>787 440</b> | 4791                                      | 7919        | 10 986        | 12 100        |
| Liver transplant (subsequent year) to liver-related death        | 0.024              | <b>767 078</b> | 4227                                      | 7599        | 10 742        | 12 054        |
|                                                                  | 0.110              | <b>799 498</b> | 4455                                      | 8148        | 10 894        | 12 146        |
| SVR after cirrhosis to                                           | 0.002              | <b>780 803</b> | 4303                                      | 7950        | 10 360        | 11 734        |

|                                                                          |                      |                                  |              |              |                  |                  |
|--------------------------------------------------------------------------|----------------------|----------------------------------|--------------|--------------|------------------|------------------|
| decompensated cirrhosis                                                  | 0.036                | <b>949 728</b>                   | 3189         | 6058         | 8224             | 9430             |
| SVR after cirrhosis to<br>hepatocellular carcinoma                       | 0.002<br>0.013       | <b>755 481</b><br><b>841 828</b> | 4745<br>4089 | 8377<br>7431 | 11 261<br>9887   | 12 771<br>11 017 |
| <b>Agent's Behavior Inputs</b>                                           |                      |                                  |              |              |                  |                  |
| Uptake rate of HCV testing in<br>prison under risk-based scenario        | 0.5<br>1.0           | <b>780 803</b><br><b>780 803</b> | 2716<br>5859 | 7950<br>7950 | 10 360<br>10 360 | 11 734<br>11 734 |
| Uptake rate of HCV testing in<br>prison under opt-out scenarios          | 0.8<br>1             | <b>780 803</b><br><b>780 803</b> | 4303<br>4303 | 6851<br>8514 | 9613<br>11 749   | 11 169<br>13 092 |
| F0 HCV diagnosis probability                                             | 0.02787<br>0.04606   | <b>781 165</b><br><b>780 158</b> | 4593<br>4181 | 7980<br>7965 | 10 498<br>9964   | 12 008<br>11 612 |
| F1 HCV diagnosis probability                                             | 0.02236<br>0.03702   | <b>781 443</b><br><b>779 856</b> | 4349<br>4486 | 8148<br>7614 | 10 345<br>10 254 | 12 069<br>11 963 |
| F2 HCV diagnosis probability                                             | 0.03179<br>0.05246   | <b>782 145</b><br><b>778 727</b> | 4013<br>4394 | 7767<br>7767 | 9842<br>10 269   | 11 474<br>11 520 |
| F3 HCV diagnosis probability                                             | 0.03471<br>0.05724   | <b>785 788</b><br><b>776 294</b> | 4852<br>4181 | 8606<br>8041 | 11 459<br>10 421 | 12 939<br>11 795 |
| F4 HCV diagnosis probability                                             | 0.12439<br>0.19926   | <b>793 284</b><br><b>771 785</b> | 4776<br>4379 | 8682<br>7263 | 11 612<br>9521   | 13 122<br>10 833 |
| Probability of quitting IDU<br>(monthly)                                 | 0.004967<br>0.006655 | <b>780 894</b><br><b>780 238</b> | 4639<br>3693 | 7843<br>7583 | 10 772<br>9948   | 12 283<br>11 368 |
| Treatment initiation probability per<br>month (prisoners)                | 0.036<br>0.046       | <b>780 871</b><br><b>780 741</b> | 4013<br>4486 | 7446<br>8255 | 10 208<br>10 879 | 11 490<br>12 451 |
| Treatment initiation probability per<br>month (general population)       | 0.023<br>0.029       | <b>789 542</b><br><b>773 292</b> | 4654<br>4425 | 8011<br>7995 | 10 528<br>10 498 | 11 581<br>11 795 |
| Baseline crime probability                                               | 10%<br>decrease      | <b>781 066</b>                   | 3616         | 6485         | 8301             | 9353             |
|                                                                          | 10%<br>increase      | <b>779 990</b>                   | 5569         | 9781         | 12 283           | 13 961           |
| HCV transmission probability                                             | 0.00005<br>0.00025   | <b>769 477</b><br><b>792 044</b> | 3769<br>4944 | 7171<br>8117 | 9353<br>11 154   | 10 421<br>13 061 |
| Awareness reduction factor                                               | 0.25<br>0.75         | <b>785 887</b><br><b>775 844</b> | 4654<br>5081 | 7675<br>8133 | 10 650<br>10 696 | 12 176<br>11 947 |
| Treatment reduction factor                                               | 0<br>1               | <b>780 772</b><br><b>780 410</b> | 4394<br>3998 | 7721<br>7583 | 10 605<br>10 269 | 12 115<br>11 444 |
| <b>HCV-associated Agent Characteristics</b>                              |                      |                                  |              |              |                  |                  |
| HCV prevalence among newborn                                             | 0.000061<br>0.00018  | <b>780 375</b><br><b>781 245</b> | 4593<br>4349 | 7751<br>8117 | 10 528<br>10 620 | 12 039<br>12 039 |
| Proportion of patients aware of<br>HCV infection (General<br>population) | 25%<br>75%           | <b>836 175</b><br><b>733 547</b> | 5661<br>4135 | 9826<br>6866 | 12 695<br>9231   | 14 846<br>10 345 |
| Proportion of patients aware of                                          | 10%                  | <b>782 733</b>                   | 5066         | 8941         | 11 810           | 12 954           |

|                                                               |               |                |      |      |        |        |
|---------------------------------------------------------------|---------------|----------------|------|------|--------|--------|
| HCV infection (Prisoners)                                     | 50%           | <b>776 309</b> | 3967 | 6897 | 8835   | 9933   |
| Proportion of treatment-experienced patients initially        | 0.29          | <b>793 234</b> | 4684 | 8240 | 11 017 | 12 603 |
|                                                               | 0.49          | <b>776 626</b> | 4440 | 7889 | 10 635 | 11 963 |
|                                                               | Community:    |                |      |      |        |        |
|                                                               | 30%, Prisons: | <b>771 232</b> | 3860 | 6378 | 8743   | 9857   |
| Proportion of diagnosed patients eligible for treatment       | 47%           |                |      |      |        |        |
|                                                               | Community:    |                |      |      |        |        |
|                                                               | 50%, Prisons: | <b>725 773</b> | 5249 | 9460 | 12 649 | 14 221 |
|                                                               | 78%           |                |      |      |        |        |
| Additional treatment eligibility with interferon-free regimen | 0.12975       | <b>800 394</b> | 4333 | 7431 | 10 193 | 11 474 |
|                                                               | 0.21625       | <b>759 658</b> | 4715 | 8468 | 11 123 | 12 451 |
| <b>Miscellaneous</b>                                          |               |                |      |      |        |        |
|                                                               | 46% discount  |                |      |      |        |        |
| Drug price                                                    | of WAC        | <b>780 803</b> | 4303 | 7950 | 10 360 | 11 734 |
|                                                               | AWP           | <b>780 803</b> | 4303 | 7950 | 10 360 | 11 734 |
| Self-clearance probability after acute infection              | 0.23          | <b>781 577</b> | 4516 | 7904 | 10 620 | 12 207 |
|                                                               | 0.28          | <b>779 265</b> | 4745 | 7767 | 10 559 | 11 932 |
| SMR of inmates                                                | 0.77          | <b>781 459</b> | 4364 | 8514 | 11 001 | 12 542 |
|                                                               | 0.94          | <b>780 467</b> | 4639 | 8636 | 10 544 | 11 871 |
| SVR rates of oral DAAs                                        | 0% decrease   | <b>780 803</b> | 4303 | 7950 | 10 360 | 11 734 |
|                                                               | 15% decrease  | <b>781 092</b> | 4455 | 8178 | 10 803 | 12 298 |
| Generic drug availability year                                | 2025          | <b>779 265</b> | 4257 | 8072 | 10 437 | 11 902 |
|                                                               | 2032          | <b>781 050</b> | 4211 | 7995 | 10 254 | 11 779 |
| Time horizon                                                  | 20 years      | <b>645 914</b> | 3616 | 6195 | 7904   | 8728   |
|                                                               | 40 years      | <b>841 813</b> | 4867 | 8453 | 11 596 | 13 321 |

457 <sup>a</sup> Liver-deaths averted in comparison with no screening were presented in the sensitivity analysis. Because the overall  
458 number of liver-deaths under no screening also changed for each parameter in the sensitivity analysis, the relative number  
459 of liver-deaths averted in the base case may not necessarily remain within the range obtained by low or high parameter  
460 values. Second, the trends may look inconsistent if the results obtained by low and high parameters are directly compared  
461 to each other. Third, because of small differences across strategies, results could be influenced by first-order uncertainty  
462 that could result in inconsistent trends.

463 <sup>b</sup> In the base case, we simulated fibrosis progression by using regression equations (eTable 6); however, for 1-way  
464 sensitivity analysis, we used fixed upper and lower values of fibrosis progression instead of equations.

465 Abbreviations: DAA, direct anti-viral agent; HCV, hepatitis C virus; METAVIR, meta-analysis of histologic data in viral  
466 hepatitis; F0-F4, METAVIR fibrosis score; SVR, sustained virologic response; SMR, standardized mortality ratio; WAC,  
467 wholesale acquisition cost; AWP, average wholesale price.

468  
469  
470

**eTable 17. Results of 1-Way Sensitivity Analysis Showing the Cost-effectiveness of Screening Strategies**

| Parameter | Value (low / | Probability of Cost-effectiveness in 40 runs (%) <sup>b</sup> |
|-----------|--------------|---------------------------------------------------------------|
|-----------|--------------|---------------------------------------------------------------|

|                                                                  | high) | No-Screening | 1Yr-Risk | 1Yr-All    | 5Yr-All     | 10Yr-All    |
|------------------------------------------------------------------|-------|--------------|----------|------------|-------------|-------------|
| <b>Base Case</b>                                                 |       | <b>0</b>     | <b>0</b> | <b>5.0</b> | <b>22.5</b> | <b>72.5</b> |
| <b>Transition Probabilities</b>                                  |       |              |          |            |             |             |
| <b>(Annually)</b>                                                |       |              |          |            |             |             |
| F0 to F1 <sup>a</sup>                                            | 0.104 | 0            | 0        | 5.0        | 17.5        | 77.5        |
|                                                                  | 0.130 | 0            | 0        | 2.5        | 20.0        | 77.5        |
| F1 to F2 <sup>a</sup>                                            | 0.075 | 0            | 0        | 2.5        | 10.0        | 87.5        |
|                                                                  | 0.096 | 0            | 0        | 2.5        | 15.0        | 82.5        |
| F2 to F3 <sup>a</sup>                                            | 0.109 | 0            | 0        | 2.5        | 12.5        | 85.0        |
|                                                                  | 0.133 | 0            | 0        | 2.5        | 15.0        | 82.5        |
| F3 to compensated cirrhosis                                      | 0.104 | 0            | 0        | 0          | 22.5        | 77.5        |
| (F4) <sup>a</sup>                                                | 0.129 | 0            | 0        | 0          | 12.5        | 87.5        |
| F3 to hepatocellular carcinoma                                   | 0.003 | 0            | 0        | 7.5        | 22.5        | 70.0        |
|                                                                  | 0.014 | 0            | 0        | 2.5        | 10.0        | 87.5        |
| Compensated cirrhosis (F4) to decompensated cirrhosis            | 0.010 | 0            | 0        | 5.0        | 25.0        | 70.0        |
|                                                                  | 0.039 | 0            | 0        | 7.5        | 10.0        | 82.5        |
| Compensated cirrhosis (F4) to hepatocellular carcinoma           | 0.010 | 0            | 0        | 2.5        | 22.5        | 75.0        |
|                                                                  | 0.079 | 0            | 0        | 0          | 5.0         | 95.0        |
| Decompensated cirrhosis to hepatocellular carcinoma              | 0.030 | 0            | 0        | 2.5        | 20.0        | 77.5        |
|                                                                  | 0.083 | 0            | 0        | 2.5        | 20.0        | 77.5        |
| Decompensated cirrhosis to liver transplant                      | 0.010 | 0            | 0        | 7.5        | 10.0        | 82.5        |
|                                                                  | 0.062 | 0            | 0        | 2.5        | 20.0        | 77.5        |
| Decompensated cirrhosis (first year) to liver-related death      | 0.065 | 0            | 0        | 5.0        | 20.0        | 75.0        |
|                                                                  | 0.190 | 0            | 0        | 2.5        | 10.0        | 87.5        |
| Decompensated cirrhosis (subsequent year) to liver-related death | 0.065 | 0            | 0        | 5.0        | 12.5        | 82.5        |
|                                                                  | 0.190 | 0            | 0        | 2.5        | 20.0        | 77.5        |
| Hepatocellular carcinoma to liver transplant                     | 0.000 | 0            | 0        | 2.5        | 17.5        | 80.0        |
|                                                                  | 0.140 | 0            | 0        | 5.0        | 10.0        | 85.0        |
| Hepatocellular carcinoma to liver-related death                  | 0.330 | 0            | 0        | 2.5        | 15.0        | 82.5        |
|                                                                  | 0.860 | 0            | 0        | 2.5        | 17.5        | 80.0        |
| Liver transplant (first year) to liver-related death             | 0.060 | 0            | 0        | 5.0        | 17.5        | 77.5        |
|                                                                  | 0.420 | 0            | 0        | 2.5        | 20.0        | 77.5        |
| Liver transplant (subsequent year) to liver-related death        | 0.024 | 0            | 0        | 2.5        | 15.0        | 82.5        |
|                                                                  | 0.110 | 0            | 0        | 0          | 12.5        | 87.5        |
| SVR after cirrhosis to decompensated cirrhosis                   | 0.002 | 0            | 0        | 5.0        | 22.5        | 72.5        |
|                                                                  | 0.036 | 0            | 3        | 10.0       | 25.0        | 62.5        |
| SVR after cirrhosis to hepatocellular carcinoma                  | 0.002 | 0            | 0        | 0          | 10.0        | 90.0        |
|                                                                  | 0.013 | 0            | 0        | 2.5        | 32.5        | 65.0        |
| <b>Costs (2014 US dollars)</b>                                   |       |              |          |            |             |             |



|                               |         |   |   |     |      |      |
|-------------------------------|---------|---|---|-----|------|------|
| HCV management costs: F0      | 540     | 0 | 0 | 5.0 | 22.5 | 72.5 |
|                               | 912     | 0 | 0 | 5.0 | 22.5 | 72.5 |
| HCV management costs: F1      | 540     | 0 | 0 | 2.5 | 20.0 | 77.5 |
|                               | 912     | 0 | 0 | 5.0 | 22.5 | 72.5 |
| HCV management costs: F2      | 552     | 0 | 0 | 2.5 | 20.0 | 77.5 |
|                               | 924     | 0 | 0 | 5.0 | 22.5 | 72.5 |
| HCV management costs: F3      | 1128    | 0 | 0 | 2.5 | 22.5 | 75.0 |
|                               | 1872    | 0 | 0 | 5.0 | 22.5 | 72.5 |
| HCV management costs:         | 1308    | 0 | 0 | 5.0 | 22.5 | 72.5 |
| compensated cirrhosis (F4)    | 2184    | 0 | 0 | 5.0 | 22.5 | 72.5 |
| HCV management costs:         | 14 544  | 0 | 0 | 5.0 | 22.5 | 72.5 |
| decompensated cirrhosis       | 24 240  | 0 | 0 | 2.5 | 22.5 | 75.0 |
| HCV management costs:         | 26 736  | 0 | 0 | 5.0 | 22.5 | 72.5 |
| hepatocellular carcinoma      | 44 568  | 0 | 0 | 5.0 | 22.5 | 72.5 |
| HCV management costs: liver   | 78 949  | 0 | 0 | 5.0 | 22.5 | 72.5 |
| transplant, first year        | 131 589 | 0 | 0 | 5.0 | 22.5 | 72.5 |
| HCV management costs: liver   | 20 292  | 0 | 0 | 5.0 | 22.5 | 72.5 |
| transplant, subsequent year   | 33 828  | 0 | 0 | 2.5 | 22.5 | 75.0 |
| HCV ELISA test                | 25      | 0 | 0 | 2.5 | 20.0 | 77.5 |
|                               | 41      | 0 | 0 | 5.0 | 22.5 | 72.5 |
| Quantitation HCV RNA          | 69      | 0 | 0 | 5.0 | 22.5 | 72.5 |
|                               | 115     | 0 | 0 | 5.0 | 22.5 | 72.5 |
| FibroSure test                | 474     | 0 | 0 | 5.0 | 22.5 | 72.5 |
|                               | 789     | 0 | 0 | 5.0 | 22.5 | 72.5 |
| HCV genotype assay            | 306     | 0 | 0 | 5.0 | 22.5 | 72.5 |
|                               | 510     | 0 | 0 | 5.0 | 22.5 | 72.5 |
| <b>Health-Related</b>         |         |   |   |     |      |      |
| <b>Quality-of-Life Inputs</b> |         |   |   |     |      |      |
| METAVIR score F0, F1          | 0.84    | 0 | 0 | 2.5 | 17.5 | 80.0 |
|                               | 0.99    | 0 | 0 | 7.5 | 20.0 | 72.5 |
| METAVIR score F2, F3          | 0.84    | 0 | 0 | 0   | 12.5 | 87.5 |
|                               | 0.99    | 0 | 0 | 7.5 | 25.0 | 67.5 |
| Compensated cirrhosis         | 0.81    | 0 | 0 | 2.5 | 15.0 | 82.5 |
| (METAVIR score F4)            | 0.99    | 0 | 0 | 7.5 | 25.0 | 67.5 |
| Decompensated cirrhosis       | 0.57    | 0 | 0 | 2.5 | 20.0 | 77.5 |
|                               | 0.99    | 0 | 0 | 5.0 | 22.5 | 72.5 |
| Hepatocellular carcinoma      | 0.54    | 0 | 0 | 2.5 | 20.0 | 77.5 |
|                               | 0.99    | 0 | 0 | 5.0 | 22.5 | 72.5 |
| Post liver transplant         | 0.77    | 0 | 0 | 2.5 | 22.5 | 75.0 |
|                               | 0.93    | 0 | 0 | 5.0 | 22.5 | 72.5 |
| Post SVR (F0-F1)              | 0.92    | 0 | 0 | 7.5 | 25.0 | 67.5 |

|                                                                    |              |   |   |      |      |      |
|--------------------------------------------------------------------|--------------|---|---|------|------|------|
|                                                                    | 1.00         | 0 | 0 | 5.0  | 22.5 | 72.5 |
| Post SVR (F2-F4)                                                   | 0.92         | 0 | 0 | 20.0 | 30.0 | 50.0 |
|                                                                    | 1.00         | 0 | 0 | 5.0  | 22.5 | 72.5 |
| <b>Agent's Behavior Inputs</b>                                     |              |   |   |      |      |      |
| Uptake rate of HCV testing in prison under risk-based scenario     | 0.5          | 0 | 0 | 5.0  | 22.5 | 72.5 |
|                                                                    | 1.0          | 0 | 0 | 5.0  | 22.5 | 72.5 |
| Uptake rate of HCV testing in prison under opt-out scenarios       | 0.80         | 0 | 0 | 0    | 15.0 | 85.0 |
|                                                                    | 1.00         | 0 | 0 | 2.5  | 15.0 | 82.5 |
| F0 HCV diagnosis probability                                       | 0.02787      | 0 | 0 | 5.0  | 10.0 | 85.0 |
|                                                                    | 0.04606      | 0 | 0 | 2.5  | 10.0 | 87.5 |
| F1 HCV diagnosis probability                                       | 0.02236      | 0 | 0 | 2.5  | 10.0 | 87.5 |
|                                                                    | 0.03702      | 0 | 3 | 2.5  | 12.5 | 82.5 |
| F2 HCV diagnosis probability                                       | 0.03179      | 0 | 0 | 7.5  | 7.5  | 85.0 |
|                                                                    | 0.05246      | 0 | 0 | 2.5  | 25.0 | 72.5 |
| F3 HCV diagnosis probability                                       | 0.03471      | 0 | 0 | 2.5  | 25.0 | 72.5 |
|                                                                    | 0.05724      | 0 | 0 | 0    | 15.0 | 85.0 |
| F4 HCV diagnosis probability                                       | 0.12439      | 0 | 0 | 5.0  | 17.5 | 77.5 |
|                                                                    | 0.19926      | 0 | 0 | 10.0 | 27.5 | 62.5 |
| Probability of quitting IDU (monthly)                              | 0.004967     | 0 | 0 | 5.0  | 12.5 | 82.5 |
|                                                                    | 0.006655     | 0 | 0 | 2.5  | 17.5 | 80.0 |
| Treatment initiation probability per month (prisoners)             | 0.036        | 0 | 0 | 5.0  | 20.0 | 75.0 |
|                                                                    | 0.046        | 0 | 0 | 2.5  | 7.5  | 90.0 |
| Treatment initiation probability per month (general population)    | 0.023        | 0 | 0 | 5.0  | 37.5 | 57.5 |
|                                                                    | 0.029        | 0 | 0 | 2.5  | 20.0 | 77.5 |
| Baseline crime probability                                         | 10% decrease | 0 | 0 | 7.5  | 35.0 | 57.5 |
|                                                                    | 10% increase | 0 | 0 | 0    | 22.5 | 77.5 |
| HCV transmission probability                                       | 0.00005      | 0 | 0 | 5.0  | 10.0 | 85.0 |
|                                                                    | 0.00025      | 0 | 0 | 2.5  | 10.0 | 87.5 |
| Awareness reduction factor                                         | 0.25         | 0 | 0 | 2.5  | 10.0 | 87.5 |
|                                                                    | 0.75         | 0 | 3 | 2.5  | 12.5 | 82.5 |
| Treatment reduction factor                                         | 0            | 0 | 0 | 7.5  | 7.5  | 85.0 |
|                                                                    | 1            | 0 | 0 | 2.5  | 25.0 | 72.5 |
| <b>HCV-associated Agent Characteristics</b>                        |              |   |   |      |      |      |
| HCV prevalence among newborn                                       | 0.000061     | 0 | 0 | 2.5  | 5.0  | 92.5 |
|                                                                    | 0.00018      | 0 | 0 | 2.5  | 12.5 | 85.0 |
| Proportion of patients aware of HCV infection (General population) | 25%          | 0 | 0 | 0    | 5.0  | 95.0 |
|                                                                    | 75%          | 0 | 0 | 2.5  | 30.0 | 67.5 |
| Proportion of patients aware of HCV infection (Prisoners)          | 10%          | 0 | 0 | 5.0  | 32.5 | 62.5 |
|                                                                    | 50%          | 0 | 0 | 5.0  | 30.0 | 65.0 |

|                                                               |                 |   |   |      |      |      |
|---------------------------------------------------------------|-----------------|---|---|------|------|------|
| Proportion of treatment-experienced patients initially        | 0.29            | 0 | 0 | 5.0  | 12.5 | 82.5 |
|                                                               | 0.49            | 0 | 0 | 2.5  | 22.5 | 75.0 |
|                                                               | Community:      |   |   |      |      |      |
|                                                               | 30%, Prisons:   | 0 | 0 | 0    | 15.0 | 85.0 |
| Proportion of diagnosed patients eligible for treatment       | 47%             |   |   |      |      |      |
|                                                               | Community:      |   |   |      |      |      |
|                                                               | 50%, Prisons:   | 0 | 0 | 0    | 10.0 | 90.0 |
|                                                               | 78%             |   |   |      |      |      |
| Additional treatment eligibility with interferon-free regimen | 0.12975         | 0 | 0 | 10.0 | 10.0 | 80.0 |
|                                                               | 0.21625         | 0 | 0 | 2.5  | 15.0 | 82.5 |
| <b>Miscellaneous</b>                                          |                 |   |   |      |      |      |
|                                                               | 46% discount of |   |   |      |      |      |
| Drug price                                                    | WAC             | 0 | 0 | 0    | 5.0  | 95.0 |
|                                                               | AWP             | 0 | 0 | 7.5  | 25.0 | 67.5 |
| Self-clearance probability after acute infection              | 0.23            | 0 | 0 | 5.0  | 12.5 | 82.5 |
|                                                               | 0.28            | 0 | 0 | 2.5  | 22.5 | 75.0 |
| SMR of inmates                                                | 0.77            | 0 | 0 | 2.5  | 10.0 | 87.5 |
|                                                               | 0.94            | 0 | 0 | 0    | 12.5 | 87.5 |
| SVR rates of oral DAAs                                        | 0% decrease     | 0 | 0 | 5.0  | 22.5 | 72.5 |
|                                                               | 15% decrease    | 0 | 0 | 2.5  | 20.0 | 77.5 |
| Generic drug availability year                                | 2025            | 0 | 0 | 2.5  | 2.5  | 95.0 |
|                                                               | 2032            | 0 | 0 | 5.0  | 20.0 | 75.0 |
| Time horizon                                                  | 20 years        | 0 | 8 | 45.0 | 45.0 | 2.5  |
|                                                               | 40 years        | 0 | 0 | 0    | 12.5 | 87.5 |

471 <sup>a</sup> In the base case, we simulated fibrosis progression by using regression equations (eTable 6); however, for 1-way  
472 sensitivity analysis, we used fixed upper and lower values of fibrosis progression instead of equations.

473 <sup>b</sup> We conducted sensitivity-analysis by running the model 40 times for each parameter value and presented the probability  
474 of each strategy being cost-effective using \$50,000 willingness to pay threshold. Because of small differences across  
475 strategies, results could be influenced by first-order uncertainty that could lead to inconsistent trends such as extended  
476 dominance. To avoid presentation of misleading trends, we did not present ICERs; instead we presented the likelihood of  
477 each strategy being cost-effective, as commonly done in generating cost-effectiveness acceptability curves.

478 Abbreviations: DAA, direct anti-viral agent; HCV, hepatitis C virus; METAVIR, meta-analysis of histologic data in viral  
479 hepatitis; F0-F4, METAVIR fibrosis score; ELISA, enzyme-linked immunosorbant analysis; SVR, sustained virologic  
480 response; SMR, standardized mortality ratio; WAC, wholesale acquisition cost; AWP, average wholesale price.

481

482 **eTable 18. Results of 1-Way Sensitivity Analysis Showing 1-year Prison**  
483 **Budget**

| Parameter | Value (low / high) | Prison First Year Budget Impact |          |                   |
|-----------|--------------------|---------------------------------|----------|-------------------|
|           |                    | No-Screening                    | 1Yr-Risk | 1Yr-All, 5Yr-All, |

|                                                                        |       | 10Yr-All    |             |             |
|------------------------------------------------------------------------|-------|-------------|-------------|-------------|
| Base Case                                                              |       | \$4 074 758 | \$5 899 396 | \$7 510 893 |
| <b>Transition Probabilities</b>                                        |       |             |             |             |
| <b>(Annually)</b>                                                      |       |             |             |             |
| F0 to F1 <sup>a</sup>                                                  | 0.104 | \$4 062 312 | \$5 854 316 | \$7 437 367 |
|                                                                        | 0.130 | \$4 066 321 | \$5 865 092 | \$7 450 046 |
| F1 to F2 <sup>a</sup>                                                  | 0.075 | \$4 019 835 | \$5 748 351 | \$7 292 109 |
|                                                                        | 0.096 | \$4 048 879 | \$5 794 809 | \$7 364 541 |
| F2 to F3 <sup>a</sup>                                                  | 0.109 | \$4 044 249 | \$5 875 886 | \$7 493 219 |
|                                                                        | 0.133 | \$4 129 002 | \$6 025 773 | \$7 684 629 |
| F3 to compensated cirrhosis (F4)<br><sup>a</sup>                       | 0.104 | \$4 047 586 | \$5 869 647 | \$7 486 397 |
|                                                                        | 0.129 | \$4 146 777 | \$5 976 819 | \$7 587 216 |
| F3 to hepatocellular carcinoma                                         | 0.003 | \$4 060 008 | \$5 900 951 | \$7 518 109 |
|                                                                        | 0.014 | \$4 086 000 | \$5 891 742 | \$7 491 215 |
| Compensated cirrhosis (F4) to<br>decompensated cirrhosis               | 0.010 | \$3 960 608 | \$5 881 349 | \$7 567 082 |
|                                                                        | 0.039 | \$4 096 842 | \$5 871 704 | \$7 452 557 |
| Compensated cirrhosis (F4) to<br>hepatocellular carcinoma              | 0.010 | \$4 067 594 | \$5 969 343 | \$7 650 098 |
|                                                                        | 0.079 | \$4 012 725 | \$5 634 025 | \$7 122 607 |
| Decompensated cirrhosis to<br>hepatocellular carcinoma                 | 0.030 | \$4 095 794 | \$5 930 079 | \$7 531 566 |
|                                                                        | 0.083 | \$4 060 892 | \$5 879 253 | \$7 487 799 |
| Decompensated cirrhosis to liver<br>transplant                         | 0.010 | \$4 081 105 | \$5 895 103 | \$7 499 163 |
|                                                                        | 0.062 | \$4 057 228 | \$5 860 476 | \$7 466 719 |
| Decompensated cirrhosis (first<br>year) to liver-related death         | 0.065 | \$4 184 443 | \$5 996 126 | \$7 604 141 |
|                                                                        | 0.190 | \$4 065 372 | \$5 870 050 | \$7 472 356 |
| Decompensated cirrhosis<br>(subsequent year) to liver-related<br>death | 0.065 | \$4 173 384 | \$5 989 459 | \$7 601 461 |
|                                                                        | 0.190 | \$3 939 115 | \$5 758 742 | \$7 371 299 |
| Hepatocellular carcinoma to liver<br>transplant                        | 0.000 | \$4 056 856 | \$5 859 602 | \$7 468 970 |
|                                                                        | 0.140 | \$4 085 756 | \$5 896 058 | \$7 508 216 |
| Hepatocellular carcinoma to<br>liver-related death                     | 0.330 | \$4 206 043 | \$6 016 820 | \$7 626 999 |
|                                                                        | 0.860 | \$3 719 660 | \$5 521 241 | \$7 127 338 |
| Liver transplant (first year) to<br>liver-related death                | 0.060 | \$4 078 512 | \$5 895 709 | \$7 513 066 |
|                                                                        | 0.420 | \$4 068 670 | \$5 881 902 | \$7 488 173 |
| Liver transplant (subsequent<br>year) to liver-related death           | 0.024 | \$4 073 886 | \$5 902 594 | \$7 513 465 |
|                                                                        | 0.110 | \$4 066 405 | \$5 884 900 | \$7 499 492 |
| SVR after cirrhosis to<br>decompensated cirrhosis                      | 0.002 | \$4 074 758 | \$5 899 396 | \$7 510 893 |
|                                                                        | 0.036 | \$4 097 578 | \$5 930 033 | \$7 540 576 |
| SVR after cirrhosis to<br>hepatocellular carcinoma                     | 0.002 | \$4 069 698 | \$5 892 860 | \$7 505 971 |
|                                                                        | 0.013 | \$4 086 766 | \$5 918 790 | \$7 535 440 |
| <b>Costs (2014 US dollars)</b>                                         |       |             |             |             |

|                                  |         |             |             |             |
|----------------------------------|---------|-------------|-------------|-------------|
| HCV management costs: F0         | 540     | \$4 070 797 | \$5 890 338 | \$7 497 180 |
|                                  | 912     | \$4 078 722 | \$5 908 461 | \$7 524 614 |
| HCV management costs: F1         | 540     | \$4 066 345 | \$5 881 402 | \$7 483 915 |
|                                  | 912     | \$4 083 177 | \$5 917 403 | \$7 537 887 |
| HCV management costs: F2         | 552     | \$4 066 917 | \$5 883 443 | \$7 487 181 |
|                                  | 924     | \$4 082 596 | \$5 915 342 | \$7 534 593 |
| HCV management costs: F3         | 1128    | \$4 061 162 | \$5 873 593 | \$7 471 736 |
|                                  | 1872    | \$4 088 359 | \$5 925 207 | \$7 550 060 |
| HCV management costs:            | 1308    | \$4 043 313 | \$5 846 346 | \$7 436 560 |
| compensated cirrhosis (F4)       | 2184    | \$4 106 204 | \$5 952 448 | \$7 585 227 |
| HCV management costs:            | 14 544  | \$3 927 029 | \$5 751 163 | \$7 362 174 |
| decompensated cirrhosis          | 24 240  | \$4 222 489 | \$6 047 631 | \$7 659 612 |
| HCV management costs:            | 26 736  | \$3 946 618 | \$5 770 365 | \$7 380 827 |
| hepatocellular carcinoma         | 44 568  | \$4 202 900 | \$6 028 429 | \$7 640 959 |
| HCV management costs: liver      | 78 949  | \$4 074 758 | \$5 899 396 | \$7 510 893 |
| transplant, first year           | 131 589 | \$4 074 758 | \$5 899 396 | \$7 510 893 |
| HCV management costs: liver      | 20 292  | \$4 068 566 | \$5 893 204 | \$7 504 700 |
| transplant, subsequent year      | 33 828  | \$4 080 951 | \$5 905 589 | \$7 517 085 |
| HCV ELISA test                   | 25      | \$4 074 758 | \$5 880 783 | \$7 418 066 |
|                                  | 41      | \$4 074 758 | \$5 918 014 | \$7 603 738 |
| Quantitation HCV RNA             | 69      | \$4 074 758 | \$5 892 823 | \$7 498 066 |
|                                  | 115     | \$4 074 758 | \$5 905 970 | \$7 523 720 |
| FibroSure test                   | 474     | \$4 074 758 | \$5 887 865 | \$7 488 182 |
|                                  | 789     | \$4 074 758 | \$5 910 928 | \$7 533 603 |
| HCV genotype assay               | 306     | \$4 074 758 | \$5 875 932 | \$7 464 561 |
|                                  | 510     | \$4 074 758 | \$5 922 859 | \$7 557 220 |
| <b>Agent's Behavior Inputs</b>   |         |             |             |             |
| Uptake rate of HCV testing in    | 0.5     | \$4 074 758 | \$5 329 834 | \$7 510 893 |
| prison under risk-based scenario | 1.0     | \$4 074 758 | \$6 475 577 | \$7 510 893 |
| Uptake rate of HCV testing in    | 0.8     | \$4 074 758 | \$5 899 396 | \$7 158 083 |
| prison under opt-out scenarios   | 1       | \$4 074 758 | \$5 899 396 | \$7 928 777 |
| F0 HCV diagnosis probability     | 0.02787 | \$4 069 499 | \$5 896 348 | \$7 512 250 |
|                                  | 0.04606 | \$4 083 674 | \$5 909 147 | \$7 516 477 |
| F1 HCV diagnosis probability     | 0.02236 | \$4 065 632 | \$5 892 400 | \$7 504 311 |
|                                  | 0.03702 | \$4 086 686 | \$5 906 729 | \$7 512 441 |
| F2 HCV diagnosis probability     | 0.03179 | \$4 062 505 | \$5 893 355 | \$7 515 787 |
|                                  | 0.05246 | \$4 087 411 | \$5 904 980 | \$7 512 064 |
| F3 HCV diagnosis probability     | 0.03471 | \$4 049 854 | \$5 894 429 | \$7 515 400 |
|                                  | 0.05724 | \$4 103 721 | \$5 911 603 | \$7 501 904 |
| F4 HCV diagnosis probability     | 0.12439 | \$3 942 251 | \$5 833 266 | \$7 489 934 |
|                                  | 0.19926 | \$4 128 365 | \$5 892 093 | \$7 467 748 |

|                                                                    |                                 |             |             |             |
|--------------------------------------------------------------------|---------------------------------|-------------|-------------|-------------|
| Probability of quitting IDU (monthly)                              | 0.004967                        | \$4 105 123 | \$6 002 639 | \$7 574 949 |
|                                                                    | 0.006655                        | \$4 018 096 | \$5 736 224 | \$7 382 269 |
| Treatment initiation probability per month (prisoners)             | 0.036                           | \$3 879 673 | \$5 569 521 | \$7 082 444 |
|                                                                    | 0.046                           | \$4 171 609 | \$6 132 803 | \$7 838 978 |
| Treatment initiation probability per month (general population)    | 0.023                           | \$4 150 094 | \$5 967 410 | \$7 577 512 |
|                                                                    | 0.029                           | \$3 993 495 | \$5 817 332 | \$7 425 646 |
| Baseline crime probability                                         | 10% decrease                    | \$3 229 337 | \$4 636 703 | \$5 914 624 |
|                                                                    | 10% increase                    | \$4 839 182 | \$6 969 502 | \$8 896 631 |
| HCV transmission probability                                       | 0.00005                         | \$4 069 499 | \$5 896 348 | \$7 512 250 |
|                                                                    | 0.00025                         | \$4 083 674 | \$5 909 147 | \$7 516 477 |
| Awareness reduction factor                                         | 0.25                            | \$4 065 632 | \$5 892 400 | \$7 504 311 |
|                                                                    | 0.75                            | \$4 086 686 | \$5 906 729 | \$7 512 441 |
| Treatment reduction factor                                         | 0                               | \$4 062 505 | \$5 893 355 | \$7 515 787 |
|                                                                    | 1                               | \$4 087 411 | \$5 904 980 | \$7 512 064 |
| <b>HCV-associated Agent Characteristics</b>                        |                                 |             |             |             |
| HCV prevalence among newborn                                       | 0.000061                        | \$4 074 755 | \$5 899 752 | \$7 511 040 |
|                                                                    | 0.00018                         | \$4 074 836 | \$5 899 503 | \$7 510 889 |
| Proportion of patients aware of HCV infection (General population) | 25%                             | \$3 605 233 | \$5 744 340 | \$7 723 569 |
|                                                                    | 75%                             | \$4 487 064 | \$5 825 451 | \$7 163 655 |
| Proportion of patients aware of HCV infection (Prisoners)          | 10%                             | \$3 829 148 | \$5 797 063 | \$7 454 315 |
|                                                                    | 50%                             | \$4 533 852 | \$6 056 427 | \$7 407 256 |
| Proportion of treatment-experienced patients initially             | 0.29                            | \$4 056 354 | \$5 844 771 | \$7 479 506 |
|                                                                    | 0.49                            | \$3 959 982 | \$5 748 713 | \$7 356 685 |
| Proportion of diagnosed patients eligible for treatment            | Community: 30%,<br>Prisons: 47% | \$4 090 263 | \$5 646 580 | \$7 074 776 |
|                                                                    | Community: 50%,<br>Prisons: 78% | \$4 287 902 | \$6 370 549 | \$8 173 870 |
| Additional treatment eligibility with interferon-free regimen      | 0.12975                         | \$3 869 903 | \$5 626 965 | \$7 182 358 |
|                                                                    | 0.21625                         | \$4 285 471 | \$6 184 092 | \$7 829 396 |
| <b>Miscellaneous</b>                                               |                                 |             |             |             |
| Drug price                                                         | 46% discount of WAC             | \$2 840 163 | \$4 042 927 | \$5 229 743 |
|                                                                    | AWP                             | \$4 611 539 | \$6 706 557 | \$8 502 697 |
| Self-clearance probability after acute infection                   | 0.23                            | \$4 056 354 | \$5 844 771 | \$7 479 506 |
|                                                                    | 0.28                            | \$3 959 982 | \$5 748 713 | \$7 356 685 |
| SMR of inmates                                                     | 0.77                            | \$4 079 331 | \$5 911 287 | \$7 520 294 |
|                                                                    | 0.94                            | \$4 068 860 | \$5 891 886 | \$7 496 164 |
| SVR rates of oral DAAs                                             | 0% decrease                     | \$4 074 758 | \$5 899 396 | \$7 510 893 |
|                                                                    | 15% decrease                    | \$4 074 758 | \$5 899 396 | \$7 510 893 |
| Generic drug availability year                                     | 2025                            | \$4 074 758 | \$5 899 396 | \$7 510 893 |

|              |          |             |             |             |
|--------------|----------|-------------|-------------|-------------|
|              | 2032     | \$4 074 758 | \$5 899 396 | \$7 510 893 |
| Time horizon | 20 years | \$4 074 758 | \$5 899 396 | \$7 510 893 |
|              | 40 years | \$4 074 758 | \$5 899 396 | \$7 510 893 |

484 <sup>a</sup> In the base case, we simulated fibrosis progression by using regression equations (eTable 6); however, for 1-way  
485 sensitivity analysis, we used fixed upper and lower values of fibrosis progression instead of equations.  
486 Abbreviations: DAA, direct anti-viral agent; HCV, hepatitis C virus; METAVIR, meta-analysis of histologic data in viral  
487 hepatitis; F0-F4, METAVIR fibrosis score; ELISA, enzyme-linked immunosorbant analysis; SVR, sustained virologic  
488 response; SMR, standardized mortality ratio; WAC, wholesale acquisition cost; AWP, average wholesale price.

489  
490  
491

**eTable 19. Results of 1-Way Sensitivity Analysis Showing 15-year Prison Budget**

| Parameter                                                   | Value (low/<br>high) | Prison Fifteen Year Budget Impact |                      |                      |                      |                      |
|-------------------------------------------------------------|----------------------|-----------------------------------|----------------------|----------------------|----------------------|----------------------|
|                                                             |                      | No-Screening                      | 1Yr-Risk             | 1Yr-All              | 5Yr-All              | 10Yr-All             |
| <b>Base Case</b>                                            |                      | <b>\$ 21 551 720</b>              | <b>\$ 26 255 477</b> | <b>\$ 30 176 159</b> | <b>\$ 33 211 401</b> | <b>\$ 34 917 431</b> |
| <b>Transition Probabilities (Annually)</b>                  |                      |                                   |                      |                      |                      |                      |
| F0 to F1 <sup>a</sup>                                       | 0.104                | \$ 21 148 032                     | \$ 25 713 984        | \$ 29 580 662        | \$ 32 453 951        | \$ 34 019 550        |
|                                                             | 0.130                | \$ 21 284 170                     | \$ 25 914 911        | \$ 29 798 723        | \$ 32 714 871        | \$ 34 351 330        |
| F1 to F2 <sup>a</sup>                                       | 0.075                | \$ 20 873 640                     | \$ 25 333 110        | \$ 29 161 773        | \$ 31 963 231        | \$ 33 506 299        |
|                                                             | 0.096                | \$ 21 294 283                     | \$ 25 879 519        | \$ 29 783 848        | \$ 32 664 934        | \$ 34 338 107        |
| F2 to F3 <sup>a</sup>                                       | 0.109                | \$ 22 192 544                     | \$ 27 009 107        | \$ 31 091 247        | \$ 34 260 180        | \$ 36 008 526        |
|                                                             | 0.133                | \$ 22 687 587                     | \$ 27 678 903        | \$ 31 909 692        | \$ 35 194 034        | \$ 36 985 327        |
| F3 to compensated cirrhosis (F4) <sup>a</sup>               | 0.104                | \$ 21 639 171                     | \$ 26 443 005        | \$ 30 393 538        | \$ 33 470 181        | \$ 35 175 218        |
|                                                             | 0.129                | \$ 22 113 393                     | \$ 26 922 296        | \$ 30 872 493        | \$ 33 816 578        | \$ 35 465 985        |
| F3 to hepatocellular carcinoma                              | 0.003                | \$ 21 481 938                     | \$ 26 323 862        | \$ 30 281 142        | \$ 33 361 347        | \$ 35 128 029        |
|                                                             | 0.014                | \$ 21 636 583                     | \$ 26 307 346        | \$ 30 196 742        | \$ 33 135 837        | \$ 34 817 279        |
| Compensated cirrhosis (F4) to decompensated cirrhosis       | 0.010                | \$ 20 675 931                     | \$ 25 654 187        | \$ 29 885 193        | \$ 33 105 300        | \$ 34 932 187        |
|                                                             | 0.039                | \$ 21 840 681                     | \$ 26 364 542        | \$ 30 189 588        | \$ 33 149 929        | \$ 34 845 628        |
| Compensated cirrhosis (F4) to hepatocellular carcinoma      | 0.010                | \$ 21 810 610                     | \$ 26 814 290        | \$ 31 025 363        | \$ 34 214 860        | \$ 36 024 620        |
|                                                             | 0.079                | \$ 20 286 695                     | \$ 24 350 982        | \$ 27 855 580        | \$ 30 590 609        | \$ 32 147 933        |
| Decompensated cirrhosis to hepatocellular carcinoma         | 0.030                | \$ 21 978 573                     | \$ 26 771 278        | \$ 30 709 945        | \$ 33 722 093        | \$ 35 437 955        |
|                                                             | 0.083                | \$ 21 448 482                     | \$ 26 147 591        | \$ 30 079 797        | \$ 33 089 706        | \$ 34 826 201        |
| Decompensated cirrhosis to liver transplant                 | 0.010                | \$ 21 583 609                     | \$ 26 341 962        | \$ 30 284 461        | \$ 33 265 594        | \$ 34 968 817        |
|                                                             | 0.062                | \$ 21 609 813                     | \$ 26 337 357        | \$ 30 290 057        | \$ 33 324 746        | \$ 35 005 403        |
| Decompensated cirrhosis (first year) to liver-related death | 0.065                | \$ 22 345 784                     | \$ 27 103 689        | \$ 31 033 224        | \$ 34 020 334        | \$ 35 705 320        |
|                                                             | 0.190                | \$ 21 487 272                     | \$ 26 180 863        | \$ 30 165 014        | \$ 33 224 138        | \$ 34 957 395        |

|                                |         |               |               |               |               |               |
|--------------------------------|---------|---------------|---------------|---------------|---------------|---------------|
| Decompensated cirrhosis        | 0.065   | \$ 22 600 252 | \$ 27 294 757 | \$ 31 219 772 | \$ 34 235 399 | \$ 35 922 454 |
| (subsequent year) to           | 0.190   | \$ 20 304 229 | \$ 25 043 629 | \$ 28 989 450 | \$ 32 031 068 | \$ 33 733 061 |
| liver-related death            |         |               |               |               |               |               |
| Hepatocellular carcinoma       | 0.000   | \$ 21 318 199 | \$ 26 018 705 | \$ 29 947 142 | \$ 32 945 089 | \$ 34 685 574 |
| to liver transplant            | 0.140   | \$ 21 995 729 | \$ 26 730 014 | \$ 30 659 916 | \$ 33 653 889 | \$ 35 423 076 |
| Hepatocellular carcinoma       | 0.330   | \$ 22 714 951 | \$ 27 400 622 | \$ 31 360 321 | \$ 34 319 966 | \$ 36 061 548 |
| to liver-related death         | 0.860   | \$ 18 922 246 | \$ 23 762 552 | \$ 27 789 325 | \$ 30 857 379 | \$ 32 604 137 |
| Liver transplant (first year)  | 0.060   | \$ 21 600 941 | \$ 26 362 871 | \$ 30 313 787 | \$ 33 381 337 | \$ 35 152 260 |
| to liver-related death         | 0.420   | \$ 21 382 824 | \$ 26 113 774 | \$ 30 014 477 | \$ 33 072 818 | \$ 34 801 622 |
| Liver transplant               | 0.024   | \$ 21 591 358 | \$ 26 320 030 | \$ 30 260 653 | \$ 33 253 308 | \$ 34 954 448 |
| (subsequent year) to           | 0.110   | \$ 21 350 687 | \$ 26 107 970 | \$ 30 051 011 | \$ 33 021 390 | \$ 34 743 347 |
| liver-related death            |         |               |               |               |               |               |
| SVR after cirrhosis to         | 0.002   | \$ 21 551 720 | \$ 26 255 477 | \$ 30 176 159 | \$ 33 211 401 | \$ 34 917 431 |
| decompensated cirrhosis        | 0.036   | \$ 22 555 202 | \$ 27 385 373 | \$ 31 364 622 | \$ 34 458 398 | \$ 36 213 174 |
| SVR after cirrhosis to         | 0.002   | \$ 21 451 142 | \$ 26 119 399 | \$ 30 077 318 | \$ 33 095 929 | \$ 34 791 137 |
| hepatocellular carcinoma       | 0.013   | \$ 21 763 681 | \$ 26 431 060 | \$ 30 363 294 | \$ 33 466 501 | \$ 35 159 155 |
| <b>Costs (2014 US dollars)</b> |         |               |               |               |               |               |
| HCV management costs:          | 540     | \$ 21 518 364 | \$ 26 199 641 | \$ 30 099 809 | \$ 33 120 919 | \$ 34 819 440 |
| F0                             | 912     | \$ 21 585 097 | \$ 26 311 349 | \$ 30 252 557 | \$ 33 301 941 | \$ 35 015 485 |
| HCV management costs:          | 540     | \$ 21 477 689 | \$ 26 132 404 | \$ 30 009 010 | \$ 33 017 951 | \$ 34 710 562 |
| F1                             | 912     | \$ 21 625 797 | \$ 26 378 630 | \$ 30 343 415 | \$ 33 404 975 | \$ 35 124 432 |
| HCV management costs:          | 552     | \$ 21 476 221 | \$ 26 135 132 | \$ 30 014 016 | \$ 33 027 283 | \$ 34 722 710 |
| F2                             | 924     | \$ 21 627 181 | \$ 26 375 764 | \$ 30 338 221 | \$ 33 395 428 | \$ 35 112 057 |
| HCV management costs:          | 1128    | \$ 21 466 552 | \$ 26 120 465 | \$ 29 985 102 | \$ 32 999 004 | \$ 34 695 012 |
| F3                             | 1872    | \$ 21 636 912 | \$ 26 390 528 | \$ 30 367 270 | \$ 33 423 858 | \$ 35 139 914 |
| HCV management costs:          | 1308    | \$ 21 348 019 | \$ 25 962 529 | \$ 29 787 169 | \$ 32 804 327 | \$ 34 502 092 |
| compensated cirrhosis          |         |               |               |               |               |               |
| (F4)                           | 2184    | \$ 21 755 424 | \$ 26 548 431 | \$ 30 565 155 | \$ 33 618 482 | \$ 35 332 778 |
| HCV management costs:          | 14 544  | \$ 20 443 428 | \$ 25 181 634 | \$ 29 119 361 | \$ 32 171 123 | \$ 33 881 963 |
| decompensated cirrhosis        | 24 240  | \$ 22 660 019 | \$ 27 329 328 | \$ 31 232 963 | \$ 34 251 686 | \$ 35 952 906 |
| HCV management costs:          | 26 736  | \$ 20 630 420 | \$ 25 364 275 | \$ 29 302 856 | \$ 32 357 328 | \$ 34 068 540 |
| hepatocellular carcinoma       | 44 568  | \$ 22 473 028 | \$ 27 146 688 | \$ 31 049 469 | \$ 34 065 482 | \$ 35 766 331 |
| HCV management costs:          | 78 949  | \$ 21 551 720 | \$ 26 255 477 | \$ 30 176 159 | \$ 33 211 401 | \$ 34 917 431 |
| liver transplant, first year   | 131 589 | \$ 21 551 720 | \$ 26 255 477 | \$ 30 176 159 | \$ 33 211 401 | \$ 34 917 431 |
| HCV management costs:          | 20 292  | \$ 21 444 151 | \$ 26 147 896 | \$ 30 069 062 | \$ 33 104 304 | \$ 34 810 334 |
| liver transplant,              |         |               |               |               |               |               |
| subsequent year                | 33 828  | \$ 21 659 288 | \$ 26 363 058 | \$ 30 283 255 | \$ 33 318 497 | \$ 35 024 528 |
| HCV ELISA test                 | 25      | \$ 21 551 720 | \$ 26 236 864 | \$ 30 083 332 | \$ 33 029 923 | \$ 34 638 467 |
|                                | 41      | \$ 21 551 720 | \$ 26 274 094 | \$ 30 269 004 | \$ 33 392 915 | \$ 35 196 452 |
| Quantitation HCV RNA           | 69      | \$ 21 551 720 | \$ 26 248 904 | \$ 30 163 332 | \$ 33 192 185 | \$ 34 893 029 |
|                                | 115     | \$ 21 551 720 | \$ 26 262 051 | \$ 30 188 986 | \$ 33 230 618 | \$ 34 941 834 |



|                                                                 |              |               |               |               |               |               |
|-----------------------------------------------------------------|--------------|---------------|---------------|---------------|---------------|---------------|
| FibroSure test                                                  | 474          | \$ 21 551 720 | \$ 26 243 946 | \$ 30 153 448 | \$ 33 181 154 | \$ 34 883 011 |
|                                                                 | 789          | \$ 21 551 720 | \$ 26 267 009 | \$ 30 198 869 | \$ 33 241 648 | \$ 34 951 851 |
| HCV genotype assay                                              | 306          | \$ 21 551 720 | \$ 26 232 013 | \$ 30 129 828 | \$ 33 149 828 | \$ 34 847 379 |
|                                                                 | 510          | \$ 21 551 720 | \$ 26 278 940 | \$ 30 222 486 | \$ 33 272 968 | \$ 34 987 477 |
| <b>Agent's Behavior Inputs</b>                                  |              |               |               |               |               |               |
| Uptake rate of HCV                                              | 0.5          | \$ 21 551 720 | \$ 24 714 749 | \$ 30 176 159 | \$ 33 211 401 | \$ 34 917 431 |
| testing in prison under risk-based scenario                     | 1.0          | \$ 21 551 720 | \$ 27 841 055 | \$ 30 176 159 | \$ 33 211 401 | \$ 34 917 431 |
| Uptake rate of HCV                                              | 0.8          | \$ 21 551 720 | \$ 26 255 477 | \$ 29 207 223 | \$ 32 030 103 | \$ 33 720 556 |
| testing in prison under opt-out scenarios                       | 1            | \$ 21 551 720 | \$ 26 255 477 | \$ 31 222 114 | \$ 34 426 023 | \$ 36 194 758 |
| F0 HCV diagnosis probability                                    | 0.02787      | \$ 21 505 427 | \$ 26 256 247 | \$ 30 183 780 | \$ 33 226 663 | \$ 35 008 320 |
|                                                                 | 0.04606      | \$ 21 621 546 | \$ 26 300 836 | \$ 30 268 130 | \$ 33 251 753 | \$ 34 952 752 |
| F1 HCV diagnosis probability                                    | 0.02236      | \$ 21 460 494 | \$ 26 176 796 | \$ 30 096 300 | \$ 33 174 214 | \$ 34 964 259 |
|                                                                 | 0.03702      | \$ 21 591 823 | \$ 26 287 387 | \$ 30 219 733 | \$ 33 189 259 | \$ 34 869 974 |
| F2 HCV diagnosis probability                                    | 0.03179      | \$ 21 461 496 | \$ 26 170 672 | \$ 30 121 365 | \$ 33 193 216 | \$ 34 987 292 |
|                                                                 | 0.05246      | \$ 21 622 164 | \$ 26 312 144 | \$ 30 198 967 | \$ 33 237 403 | \$ 34 913 924 |
| F3 HCV diagnosis probability                                    | 0.03471      | \$ 21 403 116 | \$ 26 163 960 | \$ 30 104 704 | \$ 33 240 204 | \$ 35 065 694 |
|                                                                 | 0.05724      | \$ 21 649 339 | \$ 26 295 090 | \$ 30 197 550 | \$ 33 180 087 | \$ 34 890 870 |
| F4 HCV diagnosis probability                                    | 0.12439      | \$ 21 141 919 | \$ 25 994 826 | \$ 30 054 620 | \$ 33 284 579 | \$ 35 149 471 |
|                                                                 | 0.19926      | \$ 21 808 590 | \$ 26 339 622 | \$ 30 154 955 | \$ 33 108 846 | \$ 34 724 209 |
| Probability of quitting IDU (monthly)                           | 0.004967     | \$ 21 855 243 | \$ 26 874 743 | \$ 30 696 696 | \$ 33 789 250 | \$ 35 561 382 |
|                                                                 | 0.006655     | \$ 21 070 156 | \$ 25 468 064 | \$ 29 581 771 | \$ 32 551 437 | \$ 34 167 996 |
| Treatment initiation probability per month (prisoners)          | 0.036        | \$ 21 147 700 | \$ 25 692 225 | \$ 29 493 840 | \$ 32 421 798 | \$ 34 112 535 |
|                                                                 | 0.046        | \$ 21 863 310 | \$ 26 680 592 | \$ 30 737 393 | \$ 33 871 741 | \$ 35 657 557 |
| Treatment initiation probability per month (general population) | 0.023        | \$ 22 124 272 | \$ 26 839 429 | \$ 30 837 129 | \$ 33 876 177 | \$ 35 594 010 |
|                                                                 | 0.029        | \$ 21 039 618 | \$ 25 784 717 | \$ 29 753 005 | \$ 32 781 248 | \$ 34 521 899 |
| Baseline crime probability                                      | 10% decrease | \$ 17 353 598 | \$ 21 053 012 | \$ 24 208 441 | \$ 26 631 855 | \$ 27 975 997 |
|                                                                 | 10% increase | \$ 25 671 631 | \$ 31 320 358 | \$ 36 073 518 | \$ 39 655 067 | \$ 41 707 597 |
| HCV transmission probability                                    | 0.00005      | \$ 21 505 427 | \$ 26 256 247 | \$ 30 183 780 | \$ 33 226 663 | \$ 35 008 320 |
|                                                                 | 0.00025      | \$ 21 621 546 | \$ 26 300 836 | \$ 30 268 130 | \$ 33 251 753 | \$ 34 952 752 |
| Awareness reduction factor                                      | 0.25         | \$ 21 460 494 | \$ 26 176 796 | \$ 30 096 300 | \$ 33 174 214 | \$ 34 964 259 |
|                                                                 | 0.75         | \$ 21 591 823 | \$ 26 287 387 | \$ 30 219 733 | \$ 33 189 259 | \$ 34 869 974 |
| Treatment reduction factor                                      | 0            | \$ 21 461 496 | \$ 26 170 672 | \$ 30 121 365 | \$ 33 193 216 | \$ 34 987 292 |
|                                                                 | 1            | \$ 21 622 164 | \$ 26 312 144 | \$ 30 198 967 | \$ 33 237 403 | \$ 34 913 924 |
| <b>HCV-associated Agent Characteristics</b>                     |              |               |               |               |               |               |
| HCV prevalence among newborn                                    | 0.000061     | \$ 21 514 922 | \$ 26 228 108 | \$ 30 157 027 | \$ 33 211 775 | \$ 34 945 852 |
|                                                                 | 0.00018      | \$ 21 524 216 | \$ 26 237 754 | \$ 30 166 522 | \$ 33 201 840 | \$ 34 933 336 |
| Proportion of patients                                          | 25%          | \$ 20 576 076 | \$ 26 257 558 | \$ 30 842 773 | \$ 34 655 315 | \$ 36 717 664 |

|                                                                     |                                    |               |               |               |               |               |
|---------------------------------------------------------------------|------------------------------------|---------------|---------------|---------------|---------------|---------------|
| aware of HCV infection<br>(General population)                      | 75%                                | \$ 22 604 109 | \$ 26 461 171 | \$ 29 602 069 | \$ 32 039 725 | \$ 33 416 313 |
| Proportion of patients<br>aware of HCV infection<br>(Prisoners)     | 10%                                | \$ 20 937 420 | \$ 26 203 493 | \$ 30 425 645 | \$ 33 612 707 | \$ 35 380 462 |
|                                                                     | 50%                                | \$ 22 908 891 | \$ 26 837 063 | \$ 30 110 890 | \$ 32 837 505 | \$ 34 452 948 |
| Proportion of<br>treatment-experienced<br>patients initially        | 0.29                               | \$ 22 001 390 | \$ 26 857 076 | \$ 30 684 807 | \$ 33 961 217 | \$ 35 699 829 |
|                                                                     | 0.49                               | \$ 21 774 164 | \$ 26 482 017 | \$ 30 348 723 | \$ 33 369 556 | \$ 35 099 313 |
|                                                                     | Community:                         |               |               |               |               |               |
| Proportion of diagnosed<br>patients eligible for<br>treatment       | 30%, Prisons:<br>47%               | \$ 20 976 548 | \$ 25 093 814 | \$ 28 586 186 | \$ 31 200 079 | \$ 32 732 573 |
|                                                                     | Community:<br>50%, Prisons:<br>78% | \$ 22 271 739 | \$ 27 646 902 | \$ 31 989 922 | \$ 35 385 275 | \$ 37 322 299 |
| Additional treatment<br>eligibility with<br>interferon-free regimen | 0.12975                            | \$ 20 927 489 | \$ 25 481 182 | \$ 29 270 434 | \$ 32 191 813 | \$ 33 831 811 |
|                                                                     | 0.21625                            | \$ 22 179 781 | \$ 27 069 479 | \$ 31 122 906 | \$ 34 262 707 | \$ 36 074 225 |
| <b>Miscellaneous</b>                                                |                                    |               |               |               |               |               |
| Drug price                                                          | 46% discount<br>of WAC             | \$16 443 602  | \$19 445 843  | \$22 183 850  | \$24 161 288  | \$25 368 047  |
|                                                                     | AWP                                | \$23 772 640  | \$29 216 188  | \$33 651 075  | \$37 146 233  | \$39 069 338  |
| Self-clearance probability<br>after acute infection                 | 0.23                               | \$ 22 001 390 | \$ 26 857 076 | \$ 30 684 807 | \$ 33 961 217 | \$ 35 699 829 |
|                                                                     | 0.28                               | \$ 21 774 164 | \$ 26 482 017 | \$ 30 348 723 | \$ 33 369 556 | \$ 35 099 313 |
| SMR of inmates                                                      | 0.77                               | \$ 21 605 268 | \$ 26 364 824 | \$ 30 321 364 | \$ 33 364 209 | \$ 35 106 510 |
|                                                                     | 0.94                               | \$ 21 552 107 | \$ 26 242 642 | \$ 30 201 036 | \$ 33 220 979 | \$ 34 921 458 |
| SVR rates of oral DAAs                                              | 0% decrease                        | \$ 21 551 720 | \$ 26 255 477 | \$ 30 176 159 | \$ 33 211 401 | \$ 34 917 431 |
|                                                                     | 15% decrease                       | \$ 21 548 753 | \$ 26 294 375 | \$ 30 207 667 | \$ 33 249 143 | \$ 34 961 994 |
| Generic drug availability<br>year                                   | 2025                               | \$ 20 596 669 | \$ 25 211 883 | \$ 29 095 847 | \$ 32 030 274 | \$ 33 423 264 |
|                                                                     | 2032                               | \$ 21 551 720 | \$ 26 255 477 | \$ 30 176 159 | \$ 33 211 401 | \$ 34 917 431 |
| Time horizon                                                        | 20 years                           | \$ 21 551 720 | \$ 26 255 477 | \$ 30 176 159 | \$ 33 211 401 | \$ 34 917 431 |
|                                                                     | 40 years                           | \$ 21 551 720 | \$ 26 255 477 | \$ 30 176 159 | \$ 33 211 401 | \$ 34 917 431 |

492 <sup>a</sup> In the base case, we simulated fibrosis progression by using regression equations (eTable 6); however, for 1-way  
493 sensitivity analysis, we used fixed upper and lower values of fibrosis progression instead of equations.  
494 Abbreviations: DAA, direct anti-viral agent; HCV, hepatitis C virus; METAVIR, meta-analysis of histologic data in viral  
495 hepatitis; F0-F4, METAVIR fibrosis score; ELISA, enzyme-linked immunosorbant analysis; SVR, sustained virologic  
496 response; SMR, standardized mortality ratio; WAC, wholesale acquisition cost; AWP, average wholesale price.  
497

498 **S3.3 Scenario Analyses**

499

500 **eTable 20. 30-year cumulative incidences of infection, advanced diseases,**  
 501 **and results of cost-effectiveness analysis of scenario when all F0-F4**  
 502 **patients were eligible for treatment.**

503

|                                         | No screening  | 1Yr-Risk vs.<br>No<br>Screening | 1Yr-All vs.<br>No<br>Screening | 5Yr-All vs.<br>No<br>Screening | 10Yr-All<br>No<br>Screening |
|-----------------------------------------|---------------|---------------------------------|--------------------------------|--------------------------------|-----------------------------|
| <b>30-year Cumulative Incidences</b>    |               |                                 |                                |                                |                             |
| Total HCV Infections                    | 153 644       | -7080                           | -10 128                        | -14 709                        | -16 635                     |
| Decompensated Cirrhosis                 | 631 606       | -2956                           | -5398                          | -7221                          | -8228                       |
| Hepatocellular Carcinoma                | 726 483       | -3624                           | -6386                          | -8453                          | -9605                       |
| Liver Transplants                       | 92 306        | -339                            | -603                           | -801                           | -927                        |
| Liver-related Deaths                    | 776 141       | -5226                           | -8957                          | -11 825                        | -13 385                     |
| <b>30-year Total Cost (\$, million)</b> |               |                                 |                                |                                |                             |
| Screening Cost                          | \$0           | +\$37                           | +\$107                         | +\$179                         | +\$250                      |
| Treatment Cost                          | \$88 927      | +\$1590                         | +\$2975                        | +\$4052                        | +\$4663                     |
| <b>Advanced HCV Complications</b>       |               |                                 |                                |                                |                             |
| Cost                                    | \$91 339      | -\$200                          | -\$332                         | -\$490                         | -\$560                      |
| <b>Cost-Effectiveness Analysis</b>      | No screening  | 1Yr-Risk vs.<br>No<br>screening | 1Yr-All vs.<br>1Yr-Risk        | 5Yr-All vs.<br>1Yr-All         | 10Yr-All<br>vs. 5Yr-All     |
| QALY                                    | 5 677 427 916 | +52 189                         | +42 148                        | +27 900                        | +12 386                     |
| Total Cost (\$, million)                | \$180 266     | +\$1426                         | +\$1323                        | +\$992                         | +\$611                      |
| ICER (\$ per QALY)                      | -             | \$27 331                        | \$31 387                       | \$35 559                       | \$49 346                    |

504

Scenarios:

505

“No screening”: No screening inside prisons;

506

“1Yr-Risk”: 1-time risk-based screening of currently incarcerated and entrants who were active or former IDUs for 1-year.

507

“1Yr-All”: 1-time opt-out screening of currently incarcerated inmates and entrants for 1 year.

508

“5Yr-All”: 1-time opt-out screening of currently incarcerated inmates and entrants for 5 year.

509

“10Yr-All”: 1-time opt-out screening of currently incarcerated inmates and entrants for 10 years.

510

Abbreviations: QALY, quality-adjusted life-years; ICER, incremental cost-effectiveness ratio.

511

Note that any discrepancies in ICERs may be due to rounding.

512

513 **eTable 21. 30-year cumulative incidences of infection, advanced diseases,**  
 514 **and results of cost-effectiveness analysis of scenario when F3-F4 patients**  
 515 **were treated immediately after diagnosed.**

|  | No<br>screening | 1Yr-Risk vs.<br>No | 1Yr-All vs.<br>No | 5Yr-All vs.<br>No | 10Yr-All<br>No |
|--|-----------------|--------------------|-------------------|-------------------|----------------|
|--|-----------------|--------------------|-------------------|-------------------|----------------|

|                                         |                     | Screening                        | Screening                   | Screening                  | Screening                   |
|-----------------------------------------|---------------------|----------------------------------|-----------------------------|----------------------------|-----------------------------|
| <b>30-year Cumulative Incidences</b>    |                     |                                  |                             |                            |                             |
| Total HCV Infections                    | 156 341             | -5859                            | -8453                       | -11 772                    | -14 068                     |
| Decompensated Cirrhosis                 | 591 503             | -2464                            | -5009                       | -6702                      | -7404                       |
| Hepatocellular Carcinoma                | 683 370             | -3807                            | -6382                       | -8518                      | -9651                       |
| Liver Transplants                       | 86 233              | -366                             | -710                        | -954                       | -1057                       |
| Liver-related Deaths                    | 712 109             | -5009                            | -8751                       | -11 524                    | -13 023                     |
| <b>30-year Total Cost (\$, million)</b> |                     |                                  |                             |                            |                             |
| Screening Cost                          | \$0                 | +\$37                            | +\$107                      | +\$179                     | +\$250                      |
| Treatment Cost                          | \$75 500            | +\$851                           | +\$1569                     | +\$2051                    | +\$2339                     |
| <b>Advanced HCV Complications Cost</b>  |                     |                                  |                             |                            |                             |
| Complications Cost                      | \$84 792            | -\$134                           | -\$213                      | -\$350                     | -\$384                      |
| <b>Cost-Effectiveness Analysis</b>      | <b>No screening</b> | <b>1Yr-Risk vs. No screening</b> | <b>1Yr-All vs. 1Yr-Risk</b> | <b>5Yr-All vs. 1Yr-All</b> | <b>10Yr-All vs. 5Yr-All</b> |
| QALY                                    | 5677 199 951        | +41 905                          | +33 696                     | +20 201                    | +9898                       |
| Total Cost (\$, million)                | \$160 292           | +\$754                           | +\$709                      | +\$419                     | +\$324                      |
| ICER (\$ per QALY)                      | -                   | \$15 210                         | Dominated                   | \$16 915                   | \$27 650                    |

516  
517  
518  
519  
520  
521  
522  
523  
524  
525

Scenarios:

"No screening": No screening inside prisons;

"1Yr-Risk": 1-time risk-based screening of currently incarcerated and entrants who were active or former IDUs for 1-year.

"1Yr-All": 1-time opt-out screening of currently incarcerated inmates and entrants for 1 year.

"5Yr-All": 1-time opt-out screening of currently incarcerated inmates and entrants for 5 year.

"10Yr-All": 1-time opt-out screening of currently incarcerated inmates and entrants for 10 years.

Abbreviations: QALY, quality-adjusted life-years; ICER, incremental cost-effectiveness ratio.

Note that any discrepancies in ICERs may be due to rounding.

526 **REFERENCES**

527

- 528 1. Arnold K, Gosling J, Holmes D. *The Java programming language*. Addison-wesley  
529 Reading; 1996.
- 530 2. West HC, Sabol WJ, Greenman SJ. Prisoners in 2009. Bureau of justice statistics bulletin.  
531 2010:1-37.
- 532 3. Bureau USC. Current Population Survey, Annual Social and Economic Supplement, 2011  
533 Internet release date: November 2012.
- 534 4. Howden LM, Meyer JA. Age and sex composition: 2010. United census bureau. 2011.
- 535 5. Carson EA, Sabol WJ. Prisoners in 2011. Washington, DC: Bureau of Justice Statistics.  
536 2012.
- 537 6. Brady JE, Friedman SR, Cooper HLF, Flom PL, Tempalski B, Gostnell K. Estimating the  
538 prevalence of injection drug users in the US and in large US metropolitan areas from 1992  
539 to 2002. *J urban health*. 2008;85(3):323-51.
- 540 7. Mumola CJ, Karberg JC. Drug use and dependence, state and federal prisoners, 2004.  
541 Bureau of Justice Statistics Special Report. 2006;NCJ 213530.
- 542 8. Martin JA, Hamilton BE, Sutton PD, Ventura SJ, Mathews T, Kirmeyer S, et al. Births: final  
543 data for 2007. *National vital statistics reports*. 2010;58(24):1-125.
- 544 9. Arias E. United States life tables, 2007. *National vital statistics reports: from the Centers*  
545 *for Disease Control and Prevention, National Center for Health Statistics, National Vital*  
546 *Statistics System*. 2011;59(9):1.
- 547 10. Vlahov D, Wang C, Ompad D, Fuller CM, Caceres W, Ouellet L, et al. Mortality risk among  
548 recent-onset injection drug users in five US Cities. *Substance Use & Misuse*.  
549 2008;43(3-4):413-28.
- 550 11. Spaulding AC, Seals RM, McCallum VA, Perez SD, Brzozowski AK, Steenland NK.  
551 Prisoner survival inside and outside of the institution: implications for health-care planning.  
552 *Am J Epidemiol*. 2011;173(5):479-87.
- 553 12. Denniston MM, Jiles RB, Drobeniuc J, Klevens RM, Ward JW, McQuillan GM, et al.  
554 Chronic hepatitis C virus infection in the United States, National Health and Nutrition  
555 Examination Survey 2003 to 2010. *Ann Intern Med*. 2014;160(5):293-300.
- 556 13. Amon JJ, Garfein RS, Ahdieh-Grant L, Armstrong GL, Ouellet LJ, Latka MH, et al.  
557 Prevalence of hepatitis C virus infection among injection drug users in the United States,  
558 1994–2004. *Clinical Infectious Diseases*. 2008;46(12):1852-8.
- 559 14. Nainan OV, Alter MJ, Kruszon-Moran D, Gao FX, Xia G, McQuillan G, et al. Hepatitis C  
560 virus genotypes and viral concentrations in participants of a general population survey in  
561 the United States. *Gastroenterology*. 2006;131(2):478-84.
- 562 15. Davis GL, Alter MJ, El-Serag H, Poynard T, Jennings LW. Aging of hepatitis C virus  
563 (HCV)-infected persons in the United States: a multiple cohort model of HCV prevalence  
564 and disease progression. *Gastroenterology*. 2010;138(2):513-21.

- 565 16. Poynard T, Colombo M, Bruix J, Schiff E, Terg R, Flamm S, et al. Peginterferon alfa-2b  
566 and ribavirin: effective in patients with hepatitis C who failed interferon alfa/ribavirin  
567 therapy. *Gastroenterology*. 2009;136(5):1618-28.
- 568 17. Zeuzem S, Andreone P, Pol S, Lawitz E, Diago M, Roberts S, et al. Telaprevir for  
569 retreatment of HCV infection. *New England Journal of Medicine*. 2011;364(25):2417-28.
- 570 18. Bank W. Birth rate, crude (per 1,000 people). Online at:  
571 <http://data.worldbank.org/indicator/SP.DYN.CBRT.IN>. 2014.
- 572 19. Cottrell EB, Chou R, Wasson N, Rahman B, Guise J-M. Reducing Risk for  
573 Mother-to-Infant Transmission of Hepatitis C Virus.
- 574 20. Denniston MM, Klevens RM, McQuillan GM, Jiles RB. Awareness of infection, knowledge  
575 of hepatitis C, and medical follow-up among individuals testing positive for hepatitis C:  
576 National Health and Nutrition Examination Survey 2001-2008. *Hepatology*.  
577 2012;55(6):1652-61.
- 578 21. Spaulding AC, Thomas DL. Screening for HCV infection in jails. *Jama*.  
579 2012;307(12):1259-60.
- 580 22. Kabiri M, Jazwinski AB, Roberts MS, Schaefer AJ, Chhatwal J. The changing burden of  
581 hepatitis C virus infection in the United States: model-based predictions. *Ann Intern Med*.  
582 2014;161(3):170-80.
- 583 23. Nelson P, Mathers B, Cowie B, Hagan H, Des Jarlais D, Horyniak D, et al. The  
584 epidemiology of viral hepatitis among people who inject drugs: results of global systematic  
585 reviews. *Lancet*. 2011;378(9791):571.
- 586 24. Shiffman ML. *Chronic Hepatitis C Virus: Advances in Treatment, Promise for the Future*:  
587 Springer Science & Business Media; 2011.
- 588 25. Taylor DC, Pawar V, Kruzikas D, Gilmore KE, Pandya A, Iskandar R, et al. Methods of  
589 model calibration: observations from a mathematical model of cervical cancer.  
590 *PharmacoEconomics*. 2010;28(11):995-1000.
- 591 26. Surveillance for Viral Hepatitis – United States, 2011. Accessed at Center for Disease  
592 Control and Prevention at <http://www.cdc.gov/HEPATITIS/Statistics/index.htm> Last  
593 accessed: August 25, 2015.
- 594 27. Stout NK, Knudsen AB, Kong CY, McMahon PM, Gazelle GS. Calibration methods used  
595 in cancer simulation models and suggested reporting guidelines. *PharmacoEconomics*.  
596 2009;27(7):533-45.
- 597 28. Cardoso AC, Moucari R, Figueiredo-Mendes C, Ripault MP, Giully N, Castelnau C, et al.  
598 Impact of peginterferon and ribavirin therapy on hepatocellular carcinoma: incidence and  
599 survival in hepatitis C patients with advanced fibrosis. *Journal of Hepatology*.  
600 2010;52(5):652-7.
- 601 29. Thein HH, Yi Q, Dore GJ, Krahn MD. Estimation of stage-specific fibrosis progression  
602 rates in chronic hepatitis C virus infection: a meta-analysis and meta-regression.  
603 *Hepatology*. 2008;48(2):418-31.

- 604 30. Lok AS, Seeff LB, Morgan TR, di Bisceglie AM, Sterling RK, Curto TM, et al. Incidence of  
605 hepatocellular carcinoma and associated risk factors in hepatitis C-related advanced liver  
606 disease. *Gastroenterology*. 2009;136(1):138-48.
- 607 31. Benvegna L, Noventa F, Bernardinello E, Pontisso P, Gatta A, Alberti A. Evidence for an  
608 association between the aetiology of cirrhosis and pattern of hepatocellular carcinoma  
609 development. *Gut*. 2001;48(1):110-5.
- 610 32. Fattovich G, Giustina G, Degos F, Tremolada F, Diodati G, Almasio P, et al. Morbidity and  
611 mortality in compensated cirrhosis type C: a retrospective follow-up study of 384 patients.  
612 *Gastroenterology*. 1997;112(2):463-72.
- 613 33. Gentilini P, Laffi G, La Villa G, Romanelli RG, Buzzelli G, Casini-Raggi V, et al. Long  
614 course and prognostic factors of virus-induced cirrhosis of the liver. *The American Journal*  
615 *of Gastroenterology*. 1997;92(1):66-72.
- 616 34. Sangiovanni A, Prati GM, Fasani P, Ronchi G, Romeo R, Manini M, et al. The natural  
617 history of compensated cirrhosis due to hepatitis C virus: A 17 year cohort study of 214  
618 patients. *Hepatology*. 2006;43(6):1303-10.
- 619 35. Serfaty L, Aumaître H, Chazouillères O, Bonnand AM, Rosmorduc O, Poupon RE, et al.  
620 Determinants of outcome of compensated hepatitis C virus-related cirrhosis. *Hepatology*.  
621 1998;27(5):1435-40.
- 622 36. Bruno S, Silini E, Crosignani A, Borzio F, Leandro G, Bono F, et al. Hepatitis C virus  
623 genotypes and risk of hepatocellular carcinoma in cirrhosis: a prospective study.  
624 *Hepatology*. 1997;25(3):754-8.
- 625 37. Tateyama M, Yatsushashi H, Taura N, Motoyoshi Y, Nagaoka S, Yanagi K, et al.  
626 Alpha-fetoprotein above normal levels as a risk factor for the development of  
627 hepatocellular carcinoma in patients infected with hepatitis C virus. *Journal of*  
628 *gastroenterology*. 2011:1-9.
- 629 38. Tsukuma H, Hiyama T, Tanaka S, Nakao M, Yabuuchi T, Kitamura T, et al. Risk factors  
630 for hepatocellular carcinoma among patients with chronic liver disease. *New England*  
631 *Journal of Medicine*. 1993;328(25):1797.
- 632 39. Yoshida H, Shiratori Y, Moriyama M, Arakawa Y, Ide T, Sata M, et al. Interferon therapy  
633 reduces the risk for hepatocellular carcinoma: national surveillance program of cirrhotic  
634 and noncirrhotic patients with chronic hepatitis C in Japan. *Annals of internal medicine*.  
635 1999;131(3):174.
- 636 40. Planas R, Ballesté B, Antonio Álvarez M, Rivera M, Montoliu S, Anton Galeras J, et al.  
637 Natural history of decompensated hepatitis C virus-related cirrhosis. A study of 200  
638 patients. *Journal of Hepatology*. 2004;40(5):823-30.
- 639 41. Thuluvath P, Guidinger M, Fung J, Johnson L, Rayhill S, Pelletier S. Liver transplantation  
640 in the United States, 1999–2008. *Am J Transplant*. 2010;10(4p2):1003-19.
- 641 42. Lang K, Danchenko N, Gondek K, Shah S, Thompson D. The burden of illness associated  
642 with hepatocellular carcinoma in the United States. *J Hepatol*. 2009;50(1):89-99.

- 643 43. Saab S, Hunt DR, Stone MA, McClune A, Tong MJ. Timing of hepatitis C antiviral therapy  
644 in patients with advanced liver disease: A decision analysis model. *Liver Transpl.*  
645 2010;16(6):748-59.
- 646 44. Wolfe R, Roys E, Merion R. Trends in organ donation and transplantation in the United  
647 States, 1999–2008. *Am J Transplant.* 2010;10(4p2):961-72.
- 648 45. Davis G, Alter M, El-Serag H, Poynard T, Jennings L. Aging of hepatitis C virus  
649 (HCV)-infected persons in the United States: a multiple cohort model of HCV prevalence  
650 and disease progression. *Gastroenterology.* 2010;138(2):513-21.
- 651 46. Substance Abuse and Mental Health Services Administration, *Results from the 2012*  
652 *National Survey on Drug Use and Health: Summary of National Findings*, NSDUH Series  
653 H-46, HHS Publication No. (SMA) 13-4795. Rockville, MD: Substance Abuse and Mental  
654 Health Services Administration, 2013. Substance Abuse and Mental Health Services  
655 Administration, Rockville. 2013.
- 656 47. Office of National Drug Control Policy. ADAM II 2012 Annual report of the arrestee drug  
657 abuse monitoring program. May 2013. Available at:  
658 [http://www.whitehouse.gov/sites/default/files/ondcp/policy-and-research/adam\\_ii\\_2012\\_a](http://www.whitehouse.gov/sites/default/files/ondcp/policy-and-research/adam_ii_2012_a)  
659 [nnual\\_rpt\\_web.pdf](http://www.whitehouse.gov/sites/default/files/ondcp/policy-and-research/adam_ii_2012_a) Last accessed August 25, 2015.
- 660 48. Centers for Disease Control and Prevention. HIV Screening of Male Inmates During  
661 Prison Intake Medical Evaluation --- Washington, 2006--2010. *Morbidity and Mortality*  
662 *Weekly Report (MMWR)*. Available at:  
663 <http://www.cdc.gov/mmwr/preview/mmwrhtml/mm6024a3.htm> Last accessed August 25,  
664 2015.
- 665 49. Centers for Disease Control and Prevention. Recommendations for prevention and control  
666 of hepatitis C virus (HCV) infection and HCV-related chronic disease. *MMWR: Morbidity*  
667 *and Mortality Weekly Report.* 1998;47(No. RR-19).
- 668 50. Centers for Disease Control and Prevention. Recommendations for the identification of  
669 chronic hepatitis C virus infection among persons born during 1945-1965. *MMWR:*  
670 *Recommendations and Reports.* 2012;61(RR04):1-18.
- 671 51. 2014 American Association for the Study of Liver Diseases and Infectious Diseases  
672 Society of America Recommendations for testing, managing, and treating Hepatitis C.  
673 Available at: <http://www.hcvguidelines.org/full-report-view> Last accessed August 25,  
674 2015.
- 675 52. Evaluation and Management of Chronic Hepatitis C Virus (HCV) Infection. . Federal  
676 Bureau of Prisons Clinical Practice Guidelines. Available at:  
677 [http://www.bop.gov/resources/pdfs/hepatitis\\_c.pdf](http://www.bop.gov/resources/pdfs/hepatitis_c.pdf). Last accessed July 10, 2015.
- 678 53. Hill A, Khoo S, Fortunak J, Simmons B, Ford N. Minimum costs for producing hepatitis C  
679 direct-acting antivirals for use in large-scale treatment access programs in developing  
680 countries. *Clin Infect Dis.* 2014;58(7):928-36.
- 681 54. Rice JP, Burnett D, Tsotsis H, Lindstrom MJ, Cornett DD, Voermans P, et al. Comparison  
682 of hepatitis C virus treatment between incarcerated and community patients. *Hepatology.*  
683 2012;56(4):1252-60.



684 55. Falck-Ytter Y, Kale H, Mullen KD, Sarbah SA, Sorescu L, McCullough AJ. Surprisingly  
685 small effect of antiviral treatment in patients with hepatitis C. *Ann Intern Med.*  
686 2002;136(4):288-92.

687 56. Zeuzem S, Feinman SV, Rasenack J, Heathcote EJ, Lai MY, Gane E, et al. Peginterferon  
688 alfa-2a in patients with chronic hepatitis C. *N Engl J Med.* 2000;343(23):1666-72.

689 57. Rein DB, Smith BD, Wittenborn JS, Lesesne SB, Wagner LD, Roblin DW, et al. The  
690 cost-effectiveness of birth-cohort screening for hepatitis C antibody in U.S. primary care  
691 settings. *Ann Intern Med.* 2012;156(4):263-70.

692 58. Talal AH, LaFleur J, Hoop R, Pandya P, Martin P, Jacobson I, et al. Absolute and relative  
693 contraindications to pegylated-interferon or ribavirin in the US general patient population  
694 with chronic hepatitis C: results from a US database of over 45 000 HCV-infected,  
695 evaluated patients. *Aliment Pharmacol Ther.* 2013;37(4):473-81.

696 59. Afdhal N, Zeuzem S, Kwo P, Chojkier M, Gitlin N, Puoti M, et al. Ledipasvir and sofosbuvir  
697 for untreated HCV genotype 1 infection. *N Engl J Med.* 2014;370(20):1889-98.

698 60. Kowdley KV, Gordon SC, Reddy KR, Rossaro L, Bernstein DE, Lawitz E, et al. Ledipasvir  
699 and sofosbuvir for 8 or 12 weeks for chronic HCV without cirrhosis. *N Engl J Med.* 2014.

700 61. Lawitz E, Mangia A, Wyles D, Rodriguez-Torres M, Hassanein T, Gordon SC, et al.  
701 Sofosbuvir for previously untreated chronic hepatitis C infection. *New England Journal of*  
702 *Medicine.* 2013;368(20):1878-87.

703 62. Zeuzem S, Dusheiko G, Salupere R. Sofosbuvir+ ribavirin for 12 or 24 weeks for patients  
704 with HCV genotype 2 or 3: the VALENCE Trial. 64th Annual Meeting of the American  
705 Association for the Study of Liver Diseases, 2013. 1-5.

706 63. Ruane P, Ain D, Riad J. Sofosbuvir plus ribavirin in the treatment of chronic HCV  
707 genotype 4 infection in patients of Egyptian ancestry [abstract no. 1090]. *Hepatology.*  
708 2013;58(4 Suppl):736A.

709 64. Afdhal N, Reddy KR, Nelson DR, Lawitz E, Gordon SC, Schiff E, et al. Ledipasvir and  
710 sofosbuvir for previously treated HCV genotype 1 infection. *N Engl J Med.*  
711 2014;370(16):1483-93.

712 65. Jacobson IM, Gordon SC, Kowdley KV, Yoshida EM, Rodriguez-Torres M, Sulkowski MS,  
713 et al. Sofosbuvir for hepatitis C genotype 2 or 3 in patients without treatment options. *New*  
714 *England Journal of Medicine.* 2013;368(20):1867-77.

715 66. Kapoor R, Kohli A, Sidharthan S et al. All oral treatment for genotype 4 chronic hepatitis C  
716 infection with sofosbuvir and ledipasvir: interim results from the NIAID SYNERGY trial.  
717 [Abstract 240.] 65th Annual Meeting of the American Association for the Study of Liver  
718 Diseases (AASLD). Boston, MA.; 2014.

719 67. Guerino P, Harrison PM, Sabol WJ. Prisoners in 2010. Bureau of Justice Statistics,  
720 Washington, DC. 2011.

721 68. Sabol WJ, Minton TD, Harrison PM. Prison and jail inmates at midyear 2006. Bureau of  
722 justice statistics bulletin. 2007.

- 723 69. West HC. Prison inmates at midyear 2009: Statistical tables. Bureau of Justice Statistics  
724 Statistical Tables. 2010;NCJ 230113. Available at:  
725 <http://www.bjs.gov/content/pub/pdf/pim09st.pdf> Last accessed August 26, 2015.
- 726 70. Langan PA, Levin DJ. Recidivism of prisoners released in 1994. Federal Sentencing  
727 Reporter. 2002;15(1):58-65.
- 728 71. Rhode Island Department of Corrections Planning & Research Unit. Fiscal Year 2013  
729 Annual Population Report. Available at:  
730 [http://www.doc.ri.gov/administration/planning/docs/FY13 Annual Report.pdf](http://www.doc.ri.gov/administration/planning/docs/FY13%20Annual%20Report.pdf) Last  
731 accessed on August 25, 2015.
- 732 72. Cipriano LE, Zaric GS, Holodniy M, Bendavid E, Owens DK, Brandeau ML. Cost  
733 effectiveness of screening strategies for early identification of HIV and HCV infection in  
734 injection drug users. PLoS One. 2012;7(9):e45176.
- 735 73. Centers for Medicare & Medicaid Services. Fee schedules. Available at:  
736 <https://http://www.cms.gov/ClinicalLabFeesched> (lab fees) and  
737 [https://http://www.cms.gov/Medicare/Medicare-Fee-for-Service-Payment/PhysicianFeeSc  
738 hed/index.html?redirect=/PhysicianFeeSched](https://http://www.cms.gov/Medicare/Medicare-Fee-for-Service-Payment/PhysicianFeeSched/index.html?redirect=/PhysicianFeeSched) (physician fees). Last accessed on August  
739 26, 2015.
- 740 74. Carlson JJ, Kowdley KV, Sullivan SD, Ramsey SD, Veenstra DL. An evaluation of the  
741 potential cost-effectiveness of non-invasive testing strategies in the diagnosis of  
742 significant liver fibrosis. J Gastroenterol Hepatol. 2009;24(5):786-91.
- 743 75. First DataBank, Inc. Drug databases. Available at:  
744 <http://www.firstdatabank.com/Support/drug-pricing-policy.aspx> Last accessed August 25,  
745 2015.
- 746 76. Spaulding AS, Kim AY, Harzke AJ, Sullivan JC, Linas BP, Brewer A, et al. Impact of new  
747 therapeutics for hepatitis C virus infection in incarcerated populations. Top Antivir Med.  
748 2013;21(1):27-35.
- 749 77. Silverman E. What the 'Shocking' Gilead Discounts on its Hepatitis C Drugs Will Mean.  
750 The Wall Street Journal. Retrieved from:  
751 [http://blogs.wsj.com/pharmalot/2015/02/04/what-the-shocking-gilead-discounts-on-its-hep  
752 atitis-c-drugs-will-mean/](http://blogs.wsj.com/pharmalot/2015/02/04/what-the-shocking-gilead-discounts-on-its-hep-atitis-c-drugs-will-mean/) Accessed Feb 4, 2015.
- 753 78. Davis KL, Mitra D, Medjedovic J, Beam C, Rustgi V. Direct economic burden of chronic  
754 hepatitis C virus in a United States managed care population. Journal of Clinical  
755 Gastroenterology. 2011;45(2):e17.
- 756 79. McAdam-Marx C, McGarry LJ, Hane CA, Biskupiak J, Deniz B, Brixner DI. All-Cause and  
757 Incremental Per Patient Per Year Cost Associated with Chronic Hepatitis C Virus and  
758 Associated Liver Complications in the United States: A Managed Care Perspective. J  
759 Manag Care Pharm. 2011;17(7):531-46.
- 760 80. Chong CAKY, Gulamhussein A, Heathcote EJ, Lilly L, Sherman M, Naglie G, et al.  
761 Health-state utilities and quality of life in hepatitis C patients. Am J Gastroenterol.  
762 2003;98(3):630-8.

- 763 81. Siebert U, Sroczynski G, Rossol S, Wasem J, Ravens-Sieberer U, Kurth B, et al. Cost  
764 effectiveness of peginterferon -2b plus ribavirin versus interferon -2b plus ribavirin for  
765 initial treatment of chronic hepatitis C. *Gut*. 2003;52(3):425.
- 766 82. Wilson J, Yao G, Raftery J, Bohlius J, Brunskill S, Sandercock J, et al. A systematic  
767 review and economic evaluation of epoetin alfa, epoetin beta and darbepoetin alfa in  
768 anaemia associated with cancer, especially that attributable to cancer treatment. *Health*  
769 *Technology Assessment*. 2007;11(13):1-202.
- 770 83. Dijkgraaf MG, van der Zanden BP, de Borgie CA, Blanken P, van Ree JM, van den Brink  
771 W. Cost utility analysis of co-prescribed heroin compared with methadone maintenance  
772 treatment in heroin addicts in two randomised trials. *BMJ*. 2005;330(7503):1297.
- 773 84. Hanmer J, Lawrence WF, Anderson JP, Kaplan RM, Fryback DG. Report of nationally  
774 representative values for the noninstitutionalized US adult population for 7 health-related  
775 quality-of-life scores. *Medical Decision Making*. 2006;26(4):391-400.
- 776 85. van der Meer AJ, Veldt BJ, Feld JJ, Wedemeyer H, Dufour J-F, Lammert F, et al.  
777 Association between sustained virological response and all-cause mortality among  
778 patients with chronic hepatitis C and advanced hepatic fibrosis. *Jama*.  
779 2012;308(24):2584-93 %@ 0098-7484.
- 780 86. Carson EA. Prisoners in 2013. Washington, DC: Bureau of Justice Statistics. 2014.
- 781 87. Carson EA, Golinelli D, Bureau of Justice S, Justice USDo, Office of Justice P, United  
782 States of A. Prisoners in 2012: Trends in Admissions and Releases, 1991–2012.  
783 Washington, DC: Bureau of Justice Statistics. 2013.
- 784 88. James N. The Bureau of Prisons (BOP): Operations and Budget. Congressional Research  
785 Service. March 4, 2014. Available at: <http://www.fas.org/sqp/crs/misc/R42486.pdf> Last  
786 accessed August 27, 2015. 2014.
- 787 89. Kyckelhahn T. State corrections expenditures, FY 1982-2010. Bureau of Justice Statistics.  
788 December 2012, NCJ 239672. Available at:  
789 <http://www.bjs.gov/content/pub/pdf/scefy8210.pdf> Last accessed August 27, 2015.
- 790
